1 **Gene recruitments and dismissals in argonaut octopus genome provide insights to pelagic**  
2 **lifestyle adaptation and shell-like eggcase reacquisition**

3

4 Masa-aki Yoshida<sup>1,#</sup>, Kazuki Hirota<sup>2,3</sup>, Junichi Imoto<sup>4,\*</sup>, Miki Okuno<sup>5,\*\*</sup>, Hiroyuki Tanaka<sup>5</sup>, Rei  
5 Kajitani<sup>5</sup>, Atsushi Toyoda<sup>6,7</sup>, Takehiko Itoh<sup>5</sup>, Kazuho Ikeo<sup>2</sup>, Takenori Sasaki<sup>2,8</sup>, and Davin H.  
6 E. Setiamarga<sup>3,8,#</sup>

7 <sup>1</sup>Marine Biological Science Section, Education and Research Center for Biological Resources,  
8 Faculty of Life and Environmental Science, Shimane University, Okinoshima, Shimane 685-  
9 0024, Japan

10 <sup>2</sup>Graduate School of Science, The University of Tokyo, Bunkyo-ku, Tokyo, 113-8654, Japan

11 <sup>3</sup>Department of Applied Chemistry and Biochemistry, National Institute of Technology  
12 (KOSEN), Wakayama College, Gobo, Wakayama, 644-0012 Japan

13 <sup>4</sup>Center for Information Biology, National Institute of Genetics, Mishima, Shizuoka 411-8540,  
14 Japan

15 <sup>5</sup>School of Life Science and Technology, Tokyo Institute of Technology, Meguro-ku, Tokyo  
16 152-8550, Japan

17 <sup>6</sup>Comparative Genomics Laboratory, National Institute of Genetics, Mishima, Shizuoka 411-  
18 8540, Japan

19 <sup>7</sup>Advanced Genomics Center, National Institute of Genetics, Mishima, Shizuoka 411-8540,  
20 Japan

21 <sup>8</sup>The University Museum, The University of Tokyo, Bunkyo-ku, Tokyo, 113-0033, Japan

22

23 <sup>#</sup>Corresponding authors:

24 MAY [mayoshida@life.shimane-u.ac.jp](mailto:mayoshida@life.shimane-u.ac.jp); DHES [davin@wakayama.kosen-ac.jp](mailto:davin@wakayama.kosen-ac.jp)

25 <sup>\*</sup>Present address: Pelagic Fish Resources Division, Fisheries Stock Assessment Center,

26 Fisheries Resources Institute, Japan Fisheries Research and Education Agency, Yokohama,  
27 Kanagawa 236-8648, Japan

28 \*\*Present address: Division of Microbiology, Department of Infectious Medicine, Kurume  
29 University School of Medicine, Kurume, Fukuoka, 830-0011, Japan

30

31 **Keywords;** Comparative genomics, biomineralization, concerted evolution, Hox cluster

32

### 33 **Abstract**

34 The paper nautilus, *Argonauta argo*, also known as the greater argonaut, is a species of  
35 octopods distinctly characterized by its pelagic lifestyle and by the presence of a spiral-  
36 shaped shell-like eggcase in females. The eggcase functions by protecting the eggs laid inside  
37 it, and by building and keeping air intakes for buoyancy. To reveal the genomic background  
38 of the species' adaptation to pelagic lifestyle and the acquisition of its shell-like eggcase, we  
39 sequenced the draft genome sequence of the species. The genome size was 1.1 Gb, which is  
40 the smallest among the cephalopods known to date, with the top 215 scaffolds (average  
41 length 5,064,479 bp) covering 81% (1.09 Gb) of the total assembly. A total of 26,433 protein-  
42 coding genes were predicted from 16,802 assembled scaffolds. From these, we identified  
43 nearly intact HOX, Parahox, Wnt clusters and some gene clusters probably related to the  
44 pelagic lifestyle, such as *reflectin*, *tyrosinase*, and *opsin*. For example, *opsin* might have  
45 undergone an extensive duplication in order to adapt to the pelagic lifestyle, as opposed to  
46 other octopuses, which are mostly the benthic. Our gene models also discovered several  
47 genes homologous to those related to calcified shell formation in Conchiferan Mollusks, such  
48 as Pif-like, SOD, and TRX. Interestingly, comparative genomics analysis revealed that the  
49 homologous genes for such genes were also found in the genome of the octopus, which does  
50 not have a shell, as well as the basal cephalopods *Nautilus*. Therefore, the draft genome

51 sequence of *A. argo* we presented here had not only helped us to gain further insights into the  
52 genetic background of the dynamic recruitment and dismissal of genes for the formation of an  
53 important, converging extended phenotypic structure such as the shell and the shell-like  
54 eggcase, but also the evolution of lifestyles in Cephalopods and the octopods, from benthic to  
55 pelagic.  
56

## 57 **Introduction**

58 The paper nautilus, or the argonaut *Argonauta argo* is a member of Argonautoidea, a  
59 superfamily of octopods (Cephalopoda, Octopodiformes), but has specialized characters not  
60 found in other octopus species. It is a cosmopolitan species distributed in the global tropical  
61 and subtropical open seas (Norman, 2000). Phylogenetic analyses have placed *A. argo*  
62 together with its congener (e.g. *A. hians*), forming a monophyletic Argonautidae, and then,  
63 form a sister relationship with the blanket octopuses (e.g. *Tremoctopus*), and thus further  
64 forming the superfamily Argonautoidea (Hirota et al., 2021; Strugnell et al., 2006; Sanchez et  
65 al., 2018). Distinct synapomorphies of this superfamily, which could also be found in *A.*  
66 *argo*, are the extreme female-biased sexual size dimorphism, a comparatively large and  
67 entirely transformed hectocotylus that is coiled in a pouch below the eye until maturity, and  
68 the transferring of spermatophores to the female mantle cavity by hectocotylus detachment  
69 (Naef, 1923; Bello, 2012). Although the consensus phylogeny also suggested that  
70 Argonautoidea split from benthic ancestral octopods, members of the superfamily including  
71 *A. argo* are fully adapted to the holopelagic lifestyle and thus does not need to have any  
72 contact with the seafloor throughout its lifecycle. Several studies have suggested that the  
73 holopelagic lifestyle was probably achieved by evolutionary acquisitions of distinct  
74 characters enabling members of Argonautoidea to keep afloat in midwater and to egg  
75 brooding away from the sea floor (cf. Naef 1923; Packard & Wurtz 1994; Young 1985;  
76 Bizikov 2004). Extreme adaptations of this group to their midwater habitat have masked their  
77 evolutionary origins. Buoyancy in argonauts was probably obtained after their ancestors had  
78 already become pelagic, potentially via the pelagic paralarval or juvenile stages found in  
79 many benthic octopuses with small eggs (Finn and Norman 2010).

80 One conspicuous character separating Argonautidae, a family which includes all argonauts  
81 (genus *Argonauta*), with the rest of Argonautoidea is the presence of a biomineralized

82 eggcase in females, which external morphology mimics the spirally-wound shells of *Nautilus*  
83 and the extinct ammonites (Scales, 2015; Stevens et al., 2015). The eggcase is thought to  
84 protect the eggs laid inside or, as well as taking in air for maintaining buoyancy (Finn and  
85 Norman 2010). As such, the re-acquisition of this shell-like structure was probably important,  
86 because it helps *Argonauta* to maintain its holopelagic lifestyle. Previous observations have  
87 maintained that the “shell-like” eggcase is not a “true” shell (the Conchiferan shell) (Naef,  
88 1923).

89 The evolutionary story of shell formation and loss in Cephalopods is interesting in itself.  
90 Although being classified as a member of the Conchifera, a subphylum of Mollusks  
91 composed of members with external shells biomineralized with calcium carbonate, except for  
92 the basally diverged Nautiloids (Setiamarga et al., 2021a), extant Cephalopods mostly  
93 degenerated their shells, resulting in the complete shell loss in octopods, and vestigial shells  
94 in some decapods (squids and cuttlefishes) (Kröger et al., 2011). True Conchiferan shells are  
95 formed through the secretion of proteins from the mantle tissue, made from aragonite and  
96 calcite, have the nacreous layer and intricate microstructures (Jackson et al., 2009; Kocot et  
97 al., 2016; Jackson et al., 2017), which has evolved since at least in late Ordovician  
98 (Vendrasco et al., 2011; 2013). An extant member of the basal Cephalopods, the Nautiloid  
99 *Nautilus pompilius* apparently also forms their shells this way (Marie et al., 2009; Setiamarga  
100 et al., 2021a). However, despite convergence in their general external morphology, the  
101 eggcase of *Argonauta* is not considered as a true Conchiferan shell but an evolutionary  
102 innovation of the genus (Naef, 1923; Scales, 2015). It is formed through the secretion of  
103 related proteins from their arms (Naef, 1923; Scales, 2015) and has different  
104 biomineralization and microstructural profiles (Revelle and Fairbridge 1957; Mitchell *et al.*  
105 1994; Nixon and Young 2003; Saul and Stadum 2005; Oudot *et al.* 2020). Previously, we  
106 conducted an extensive multi-omics analysis on the eggcase of two argonaut species, *A. argo*

107 and *A. hians*, which samples were obtained from the Sea of Japan (Setiamarga et al., 2021b).  
108 Two important points relevant to our present study could be taken from our previous one: (1)  
109 almost no Conchiferan homologous SMP, including those of the basal Cephalopoda *Nautilus*  
110 *pompilius* (Setiamarga et al., 2021a) was present in the eggcase matrix of the two argonaut  
111 species, and (2) Conchiferan SMP homologs (or homologous domains) were also found in the  
112 genome of the shell-less octopods, *Octopus bimaculoides*. These points thus indicate that our  
113 result was in agreement with the result of morphological observations, which maintains that  
114 the eggcase is not a homologous structure of the shell. However, the observations have also  
115 caused other questions: Are the SMP genes not used in the eggcase formation still retained in  
116 the genomes of the argonauts? Comparative genome analyses across Cephalopoda, and  
117 among different representative species of Conchifera, are thus needed to answer this question.  
118 Such genomic level comparative studies would also give important insights on the evolution  
119 of holopelagic lifestyle at the genetic level.

120 Until very recently, the lack of genome data had prevented us from understanding the  
121 genetic basis of Cephalopod biology, and even molluscan biology. This was remedied by  
122 recent reports of various Cephalopod genomes, such as the genomes of *O. bimaculoides*  
123 (Albertin et al., 2019), *Euprymna scolopes* (Belcaid et al., 2019), *Architeuthis dux* (da Forsa  
124 et al. 2020), and the basal Cephalopod *Nautilus pompilius* (Zhang et al., 2021; Huang et al.,  
125 2021). Comparative genomics studies of these genomes have allowed us to identify notable  
126 characteristics of Cephalopod genomes except *Nautilus*, such as: (1) the average genome size  
127 of around 3 Gigabases (Gb), which is slightly bigger than that of other molluscan species  
128 (Gregory 2021), (2) highly rearranged genome with transposable element expansion, which  
129 have caused the genomes to be highly repetitive in nature (Albertin et al., 2015; da Fonseca et  
130 al., 2020), (3) lineage specific duplication of certain types of genes (Yoshida et al., 2011),  
131 and (4) whole transcript-wide adenosine to inosine (A-to-I) RNA editing (Alon et al. 2015;

132 Liscovitch-Brauer et al. 2017). These genomic characteristics have thus suggested that the  
133 coleoid Cephalopods have intriguingly different genomes from “standard” metazoan  
134 genomes. Another interesting point is that such differences were apparently evolutionarily  
135 acquired in ancestral Coleoids, which members show similar body plans and morphology in  
136 general (Young 1971) despite their ancient divergences (Decapodiformes (squid and  
137 cuttlefishes) vs. Octopodiformes (vampire squid and octopuses) =  $242 \pm 38$  million years ago  
138 (Mya); Nautiloidea vs. Coleoidea =  $415 \pm 60$  Mya) (Kröger et al., 2011; Vinther et al., 2012;  
139 Sanchez et al., 2016). Therefore, additional genomic data, especially of the Octopodiformes,  
140 will allow us to trace the ancestral chromosomes of Cephalopods and their transition within  
141 Mollusks, which in the end might help to unravel the evolutionary origin of these “genomic  
142 idiosyncrasies” These are major obstacles to tracing the ancestral chromosomes of  
143 cephalopods and their transition within the Mollusks.

144 Here, we report a high-quality draft genome assembly of the greater paper nautilus /  
145 greater argonaut *Argonauta argo*. We found that this species has an exceptionally small  
146 genome size, making the species an ideal species for genomic studies. Although studies  
147 targeting argonauts have not progressed because it is difficult to keep in aquaria, we have  
148 access to the location in the Sea of Japan, where fresh and living samples of this species  
149 could be easily obtained by fixed nets from June to August (Sakurai and Kono, 2010). Using  
150 obtained genome data, we focusedly discussed the evolution of some interesting genomic  
151 features such as those related to shell evolution, eggcase formation, and color vision, in order  
152 to gain insights to the genomic basis of the adaptation to the open-ocean holopelagic lifestyle  
153 of this species in particular, and the evolution of Cephalopods in general.

154

## 155 **Results and Discussion**

### 156 ***The draft genome assembly of A. argo***

157 We generated a draft genome from a single individual of a female argonaut obtained from  
158 a fixed net set on the coasts of Oki Island, Shimane Prefecture, Japan (Figure 1). A total of  
159 1.34 Gb was assembled from input sequences obtained from genome sequencing with 201×  
160 coverage (107× PE , 24× 3 kb MP, 24× 6 kb MP, 24× 10kb MP, and 24× 15kb MP). 57,036  
161 scaffolds of various lengths were assembled, with the top 215 scaffolds larger than 1000 kb  
162 (average length 5,064,479 bp), covering 81% (1.09 Gb) of the total assembly. Half of  
163 assembled scaffolds (N50) were of 6.18 Megabases (Mb) or longer, reflecting high  
164 contiguity. These statistics (Table S1) thus showed that our *A. argo* draft genome sequence  
165 ranks among the top quality draft genomes of Molluscs, and the most comprehensive for  
166 Cephalopods. For example, our N50 indicates that our *A. argo* draft genome is twice as long  
167 as that of the Hawaiian bobtail squid *E. scolopes* (Belcaid et al. 2019).

168 The discrepancy between GenomeScope estimation (1.1Gb, Figure S1) and our actual  
169 assembly size (1.34Gb; 1.25Gb non-gap regions) might be caused by the presence of  
170 bacterial contamination and/or heterogeneities caused by large insertion and deletion between  
171 haploid genomes. However, we only found a very minute amount of bacterial genome  
172 contamination in our assembly, indicating that the latter was most likely the main cause of the  
173 discrepancy. To assess the completeness of the gene space of the assembly, an analysis using  
174 BUSCO v3.0.2 (genome mode) (Simão et al. 2015) was performed by using the provided  
175 metazoan data set (metazoa\_odb9, n=978), resulting in the recovery of 91.1% of the predicted  
176 gene sequences (Table S2). Krait analysis showed that the microsatellite regions account for  
177 4.6% of the genome, with dimer and trimer regions accounting for more than 85% (Figure  
178 S2, Table S3).

179 The high-quality and relatively high level of completeness of our genome assembly, as  
180 shown by the statistics we presented above will allow us to address some lingering questions  
181 on Cephalopod biology and evolution at the genetic and genomic levels. For example, future



182 studies might utilize the microsatellite regions, which compose a part of the repeat regions in  
183 the genome, as individual markers because of the large polymorphisms within individuals, or  
184 as markers for paternity analysis of egg-masses.

185

### 186 ***Ancient gene clusters in the cephalopods: HOX, Parahox, and Wnt genes***

187 The improved contiguity of our genome assembly confirmed the presence of a Hox  
188 cluster. A large Hox cluster of nine Hox genes on four separate scaffolds was recovered in  
189 the *A. argo* genome, totaling to a length of at least 18 Mb (Figure 2). Three of the nine Hox  
190 genes are not presumed to be gene models, but we have used the Homeobox domain  
191 sequence to confirm that they are indeed present on the scaffold and that they are indeed hox  
192 genes compared to other Lophotrochozoa genes (Figure S3, Figure S4). *Hox2/proboskipedia*  
193 (*pb*) was not found, as in squid genomes (Belcaid et al., 2019; da Fonseca et al. 2020) except  
194 *Nautilus* (Zhang et al. 2021). We also could not find *Hox4/Deformed (Dfd)*, which is similar  
195 to *O. bimaculoides* (Albertin et al., 2015), and thus probably a common feature in benthic  
196 octopods (Figure S3). There are at least 10 ORFs inserted among several different Hox genes  
197 (3 between *Scr* and *Antp*, 7 between *Lox4* and *Post2*). Interestingly, no homolog was found in  
198 other organisms, including even the giant squid *A. dux* (da Fonseca et al., 2020), for any of  
199 these ORFs (Table S4).

200 Hox clusters are usually found in contigs of about 100 kb in vertebrates and >1,000 kb in  
201 invertebrates (Powers et al., 2000; Wagner et al., 2003). Meanwhile, the octopus Hox gene  
202 cluster is apparently fragmented, and the genes are present separately on its genome one by  
203 one (Albertin et al., 2015), unlike most other bilaterian genomes (Duboule, 2007). Intuitively,  
204 this finding seems to be in accordance with the staggered, non-colinear expression pattern of  
205 Hox genes in Cephalopods (Lee et al., 2003; Wollesen et al., 2018). However, our finding of  
206 a Hox cluster in the genome of *A. argo*, albeit incomplete, suggests that fragmentation of the

207 cluster is probably a feature limited to benthic octopods (or even a possible artifact of the  
208 genome assembly process of *O. bimaculoides*).

209 The presence of ORFs located among several Hox genes in the genome of *A. argo* is also  
210 intriguing, since it might indicate that the Hox cluster is actually breaking at the place where  
211 the intervening genes are located. The Patellogastropod limpet *Lottia gigantea*, another  
212 member of the shelled mollusks (Conchifera), was found to have a typical invertebrate Hox  
213 cluster spanning 471 kb with no intervening ORFs among any of its Hox genes (Simakov et  
214 al. 2012). Meanwhile, recent findings indicate that although the genome of the basal  
215 Cephalopod *N. pompilius* contains a complete set of molluscan Hox genes, they are not  
216 located together in a cluster, but are divided in 7 contigs (Zhang et al. 2021). On the other  
217 hand, the Hox genes in another Cephalopod, the giant squid *A. dux*, are apparently arranged  
218 into a disorganized cluster with insertions of intervening non-Hox genes among cluster  
219 members (da Fonseca et al., 2020). However, we found no apparent homology or synteny  
220 between any of the intervening ORFs of *A. argo* and those of *A. dux* (Table S4). The  
221 acquisition of putative ORFs inside the Hox cluster of *A. argo* is probably an indication of a  
222 situation not dissimilar to what was proposed for the fruitfly *Drosophila melanogaster*, which  
223 Hox cluster is split into two complexes, with the presence of non-homeotic genes in between  
224 (Von Allmen et al., 1996; Wagner et al., 2003; Robertson and Mahaffey, 2017), although  
225 *Drosophila* still maintained its colinear expression pattern (Graham et al., 1989; Gaunt,  
226 2015). However, the Hox cluster break in *Drosophila* is most likely a lineage-specific feature,  
227 since another model insect, the genome of the beetle *Tribolium castaneum* are intact (Von  
228 Allmen et al., 1996; Tribolium Genome Sequencing Consortium, 2008; Shippy et al., 2008).  
229 When considered altogether, it seems that the splits and breaking offs of Hox cluster could be  
230 a symplesiomorphic feature of the Cephalopod genome, but with the actual “Hox de-  
231 clustering” processes happened lineage-specifically. This might explain why Cephalopods do

232 not exhibit typical invertebrate Hox cluster arrangement seen in, for example, the limpet *L.*  
233 *gigantea*.

234 The Extended Hox complex (*Hox* genes plus *Evx*, *Mox*, and possibly *Dlx*) is also a  
235 common feature in bilaterian genomes (Montavon, 2015). In vertebrate genomes, the  
236 complex is shown to be linked to the EHGbox (*En*, *Hb9*, and *Gbx*) and NKL gene groups  
237 (*Msx*, *Emx*, etc.) and form a supercluster (Garcia-Fernández, 2005). In the *A. argo* genome,  
238 we found, probably for the first time in Spiralia, a linkage among *Dlx*, *Engrailed* (*En*), and  
239 the Hox genes (Figure 2). In the genome of the giant squid *A. dux*, *Dlx* and *En* were found in  
240 different scaffolds with no linkage to the Hox cluster whatsoever (Table S4). However in *A.*  
241 *argo*, *Dlx* was found to be located anterior to *Scr* relative to their positions to the Hox genes  
242 (Hox cognate group4), while *En* was found to be located posterior to *Post1* (Figure 2), and  
243 thus reversing the presumed ancestral state (Garcia-Fernández, 2005). Although the  
244 possibility of their reinsertions into the Hox group cannot be ruled out, this may indicate that  
245 the presence of the Extended Hox group is probably conserved in modern cephalopods,  
246 although the constraint to preserve gene order is probably relatively weak. The weak  
247 constraint in preserving gene order could also explain the “Hox de-clustering”, which  
248 characteristics include insertions of ORFs in intergenic regions, observed in Cephalopods.

249 We also found the presence of the ParaHox cluster, an evolutionary sister complex of the  
250 Hox cluster, in the genome of *A. argo* (Figure 2). The ParaHox cluster, which consists of the  
251 *Gsx*, *Xlox*, and *Cdx* gene families, are transcription factors involved in the anterior-posterior  
252 development during early embryogenesis of bilaterians (Brooke et al, 1998; Garstang and  
253 Ferrier, 2013). The ParaHox cluster is usually found intact in the genomes of Deuterostomes  
254 except sea urchin and Ascidians (Garstang and Ferrier, 2013)). However, in  
255 Lophotrochozoans, such as the annelid *Platynereis dumerilii* and the limpet *L. gigantea*, only  
256 *Gsx* and *Xlox* are clustered together, with *Cdx* broken off and thus unlinked in the genome.

257 The ParaHox cluster of *A. argo* were found to conserve the structure of a typical  
258 Lophothrocozoan cluster, similar to those reported in *Nautilus* (Huang et al. 2021) and the  
259 octopus (Li et al., 2020). Although further study is still needed, the highly conserved nature  
260 of the ParaHox clusters among Cephalopoda, mollusks, and even Lophotrochozoans,  
261 indicates a possible presence of an evolutionary constraint to conserve the cluster's presence  
262 and arrangement in the genome, after the breakage of *Cdx* from *Gsx* and *Xlox*.

263 Similarly, an older gene cluster that is widespread in the animal kingdom is Wnt. Most  
264 genomes of bilaterians have a common cluster, *wnt9-wnt1-wnt6-wnt10*, or parts of this cluster  
265 (Huang et al., 2021). This ancestral cluster of *wnts* is thought to originate in the evolution of  
266 the common ancestor of cnidarians and bilaterians (Janssen et al., 2010; Holstein 2012). In  
267 other shelled mollusks (i.e. Conchifera) such as the rock oyster *Crassostrea gigas* and the  
268 Japanese pearl oyster *P. fucata*, the limpet *L. gigantea*, and also in *O. bimaculoides*, the *wnt1-*  
269 *wnt6-wnt10* cluster was conserved (Du et al., 2018a), with *L. gigantea* and *P. fucata*  
270 seemingly retaining some of the basal lophotrochozoan / protostome *wnt* paralogs (Cho et al.,  
271 2010; Setiamarga et al., 2013). In this study, we also confirmed the linkage of *wnt6-wnt9* in  
272 *A. argo* (Figure 2), besides the standard Conchiferan cluster. This suggests that *A. argo*  
273 probably also derived this arrangement from the basal metazoan form of Wnt gene  
274 orientation and clustering (*wnt9-wnt1-wnt6-wnt10*). Meanwhile, we also observed the lack of  
275 *wnt3* and *wnt8*, which seems to be lost in the ancestral protostomes / lophotrochozoans and in  
276 ancestral Conchiferans, respectively (Janssen et al., 2010; Setiamarga et al., 2013; Liu et al.,  
277 2018; Bai et al., 2020; Wang et al., 2021).

278

### 279 ***Tandem gene duplications of gene clusters related to pelagic lifestyle***

280 Our *A. argo* genome assembly, which is of sufficiently better quality than those of  
281 previous octopods, allowed us to investigate the existence of tandem gene arrangements. Our

282 searches found two gene clusters, the Reflectins and the Tyrosinases (Figure 3, 4). Both are  
283 highly expressed in the first arms of the organism (Figure 4).

284 Four tandemly arranged gene models of the octopus *reflectin/tbc1* domain family  
285 (Aargo020153-6) and one possible ORF recovered by a BLAST search in a single scaffold  
286 were found in *A. argo* genome (Figure 3). Phylogenetic analysis showed that the three gene  
287 models are monophyletic in *A. argo*, and form a monophyletic clade together with sequences  
288 of *E. scolopes*, which also formed a monophyletic clade (Figure S5). The translated  
289 sequences of three of the four gene models have at least five of the so-called “Reflectin  
290 motifs” (M/FD(X)<sub>5</sub>MD(X)<sub>5</sub>MDX<sub>3/4</sub>) (Levenson et al. 2017, Figure S6). With only 23  
291 nucleotide substitutions, regardless of codon positions, the CDS of the tandemly duplicated  
292 *reflectin* genes in *A. argo* match each other sequences at 97%, covering 760 bp (Figure S7).  
293 Meanwhile, it is also enticing to suggest that the only gene model with a different sequence,  
294 Aargo020154, was inverted to the rest of the genes.

295 There are two possible causes to explain which duplicated genes are conserved to form  
296 gene clusters: either high level expression are favored and thus retaining duplicated genes  
297 would help to increase transcript number, or the multiple copies are conserved under different  
298 selection pressures as a result of subfunctionalization (Lynch and Force, 2000; Hahn, 2009;  
299 Morel et al., 2015; Hallin and Landry, 2019; Song et al., 2020; Ascencio et al., 2021). It has  
300 also been pointed out that the duration of concerted evolution can be influenced by selection  
301 for a certain dosage of a gene product, as gene conversion leading to highly similar sequence  
302 retentions can be advantageous when there is a selection for higher expression level of that  
303 particular gene product, or disadvantageous when divergent gene duplicates are advantageous  
304 (Sugino and Innan, 2006). Transcriptome analysis shows that in *A. argo*, *reflectin* is very  
305 highly expressed in the 1st arm and eye, and it seems to be transcribed by the three genes  
306 (Figure 3B). Therefore, this could be evidence supporting the hypothesis that the cause of

307 gene retention was to have a high level of expression. This concerted evolution may also be  
308 the reason why the Cephalopod reflectin formed monophyletic clades with members of the  
309 clusters within each species (Figure S5).

310 Then, what would be the function of the highly expressed *reflectin*? *reflectin* is found only  
311 in Cephalopods, and the function of the protein products were shown to be related to  
312 camouflage by reflecting and refracting light in the surrounding environment (DeMartini et  
313 al., 2015). Expressed proteins fill the lamellae of intracellular Bragg reflectors, allowing  
314 individuals to exhibit dynamic iris and structural color changes (Crookes et al. 2004). Several  
315 tandemly-arranged *reflectin* gene clusters have been found in the genome of *E. scolopes*, with  
316 the dominant *reflectin* transcripts are almost exclusively expressed in the light organ, eyes,  
317 and skin, and thus probably consistent with the development of symbiotic fluorescent organs  
318 specifically evolved in this lineage (Belcaid et al. 2019). However, although in *E. scolopes*,  
319 the symbiotic luminous organs are important for countershading and survival, no such organ  
320 have been found in any of the argonauts. As a defence mechanism, pelagic cephalopods blend  
321 into their surroundings by camouflaging, which is done either through translucence or cryptic  
322 coloration. The first arm membranes of the argonauts are always wrapped around the shell,  
323 and reflect light by iridescent chromatophores, causing it to look like a mirror. Meanwhile,  
324 the giant squid *A. dux* has seven *reflectin* genes and three *reflectin-like* genes on its genome,  
325 all except one are clustered on the same scaffold (da Fonseca *et al.* 2020). This non-  
326 luminescent deep-sea species has a mirror-like light-reflecting skin for cryptic coloration.  
327 These observations probably indicate that the abundantly expressed Reflectin might help the  
328 animals to have light-reflecting mirror-like surfaces, which might then play a role in the  
329 ability of these species to blend into their surroundings in the open ocean.

330 A similar pattern of possible gene conversion was observed in the *tyrosinase* gene cluster.  
331 Of the nine *tyrosinase* gene models predicted in *A. argo* genome, eight were of the

332 extracellular or secreted (alpha) type, of which four (Aargo001559-62) were found to be  
333 tandemly arranged in a single scaffold (Figure 4, Figure S8). Of the four gene models,  
334 excluding unaligned regions, similarities of amino acid sequences of the first two  
335 (Aargo001559-60) and the last two (Aargo001561-62) are very high, but only 75%  
336 similarities between the two gene pairs. However, the four genes shared an almost exact  
337 match in a region on the second half of the gene, at around the 520th - 680th aa (Figure S9).  
338 The coding DNA sequence (CDS) match rate for this region is 97% with only ca. 60  
339 substitutions, regardless of codon positions (Figure S10). These two pairs of tyrosinases are  
340 orthologous to closely related molluscan taxa including the octopus, and form monophyletic  
341 groups (Figure S8). This thus suggests that the four *tyrosinase* copies probably underwent  
342 gene conversions in two pairs (between Aargo001559 and 1560, between Aargo001661 and  
343 1662) with some partial recombinations among the four genes. Gene expression analysis  
344 using Stringtie shows that the four have a common gene expression profile, with high levels  
345 of expression in the arms and mantle. Meanwhile, the phylogenetic tree also indicates that the  
346 two pairs of the *tyrosinase* genes are apparently orthologous to those found as shell matrix  
347 protein-coding genes in Conchiferan mollusks. This finding, i.e., the genes expressed only in  
348 the arms belong to different gene clusters than those of other Tyrosinase-coding genes, might  
349 indicate that novel gene paralogs originated from previously existing endogenous *tyrosinase*  
350 genes were being duplicated and obtained high expression in the arms, possibly used for the  
351 calcified eggcase formation, which helps *A. argo* and other argonaut octopods to attain  
352 buoyancy and thus their pelagic lifestyle.

353

### 354 ***Opsin duplications and change in absorption wavelength related to pelagic lifestyle***

355 Changes in number and sequences of Opsin are thought to be involved in adaptation to  
356 visually-guided behavior. We found that *A. argo* possesses five visual pigment genes in its

357 genome: two noncanonical *r-opsins*, one canonical *r-opsins*, two *xenopsin*, and one  
358 *rgr/peropsins/retinochromes* (Figure S11-13) (Ramirez et al., 2016). In previous studies on  
359 the pygmy squid *Idiosepius paradoxus*, two *r-opsins*, one *xenopsin*, and two *retinochromes*  
360 were identified (Yoshida et al. 2015; Ramirez et al. 2016). We also checked if the expression  
361 of the opsins are tissue specific, in order to see whether there is any functional differentiation  
362 among the duplicated opsins. However, at present, we were unable to confirm such  
363 specificity, at least in the organs we examined because the data is present, such as the eye and  
364 skin. In fact, almost no study has been conducted on the functions of *xenopsins* and non-  
365 canonical *r-opsins* in the Cephalopods. In the future, a thorough gene expression analysis of  
366 these genes in different tissues should probably be conducted to resolve this issue.

367 The presence of two xenopsins in the genome of *A. argo* was apparently not an artifact or  
368 assembly error, which means that *A. argo* has an extra copy of *xenopsin* than *I. paradoxus*.  
369 The gene models for *xenopsin* in *A. argo* (Aargo004635 and Aargo004636) exist in tandem in  
370 the scaffold, albeit with the amino acid sequence being too short to be considered full-length.  
371 If we also assume that the two exons of the neighboring Aargo004633 are shared among the  
372 three gene models, we can obtain two putative complete Xenopsin proteins. In other words, it  
373 makes sense to think that the two xenopsins were probably splicing variants with alternative  
374 promoters and shared two exons, which then duplicated and subfunctionalized (Force et al.,  
375 1999; Hahn, 2009). *xenopsin* is found to be widespread but exclusively only in protostomes,  
376 co-expressed together with *r-opsin* mostly in their ciliary photoreceptor cells (Passamaneck et  
377 al., 2011; Vöcking et al., 2017; Rawlinson et al., 2019). Functional studies on *xenopsin* are  
378 lacking and we therefore cannot decisively predict its function in *A. argo*. Phylogenetically,  
379 *xenopsin* and *c-opsin* are apparently spread exclusively from each other, with *c-opsin* being  
380 found exclusively in the photoreceptor cells of deuterostomes / vertebrates, suggesting that  
381 *xenopsin*, similar to its deuterostomian counterpart *c-opsin*. is probably involved mainly in



382 phototactic responses and visual functions in protostomes (Döring et al., 2020), including *A.*  
383 *argo*, *I. paradoxus*, and probably, other Cephalopods.

384 The two copies of non-canonical *r-opsins* in the genome of *A. argo* is most likely due to  
385 the duplication of heterogeneous regions in the assembly, since the sequences matched  
386 perfectly. This suggests that there is only a single non-canonical *r-opsin* in the genome of *A.*  
387 *argo*, which is thus similar to *I. paradoxus*, as mentioned previously (Yoshida et al. 2015). At  
388 present, the function of this Opsin homolog is still unknown, although previous studies  
389 suggest that it's probably unrelated to visions, although apparently still related to  
390 photoreception (Ramirez and Oakley, 2015; Ramirez et al. 2016; Bonade et al., 2020) . We  
391 found two amino acid substitutions (T118S and Y178F) in the amino acid sequence of the  
392 non-canonical R-Opsin of *A. argo* when compared to bovine rhodopsin. T118S was found in  
393 both the benthic *O. bimaculoides* and *A. argo*, while Y178F was found only in the latter.  
394 Prediction of light absorption wavelength of the non-canonical R-Opsin of *A. argo* indicates  
395 that photoreceptions in *A. argo* are probably adapted more to red light than that of the benthic  
396 octopus. The extra amino acid substitutions are thus consistent with the ecology of *A. argo*,  
397 which lived closer to the sea surface than other cephalopods, indicating that the red-shift may  
398 be an adaptation to shallow water light environment.

399

400 ***The evolution of shell and eggcase matrix proteins through independent recruitments, losses,***  
401 ***and domain changes allows A. argo to obtain its eggcase and thus its pelagic lifestyle***

402 In this study, we found all of the eggcase matrix protein-coding genes in the genome of *A.*  
403 *argo* (Table S5) as identified by our previous multi-omics study to survey and identify major  
404 proteins of the eggcase matrices of two congeneric argonaut octopods, *A. argo* and *A. hians*  
405 (Setiamarga et al., 2021b). Exactly congruent to our previous result, most of the proteins are  
406 apparently not shared with the shell matrix proteins of Conchiferans, including those of the

407 basal Cephalopoda *Nautilus* (Setiamarga et al., 2021a; Huang et al., 2021), although the  
408 genes / proteins themselves are present in the genomes of the Conchiferan mollusks such as  
409 the limpet *L. gigantea* (Simakov et al., 2013), the true oyster *C. gigas* (Peñalosa et al., 2021),  
410 and the Japanese pearl oyster *P. fucata* (Takeuchi et al., 2016). Meanwhile, the Conchiferan  
411 shell matrix protein-coding genes were also mostly found in the genomes of *A. argo* and the  
412 shell-less benthic octopod *O. bimaculoides* (Albertin et al., 2015), indicating their retention  
413 despite shell loss in the octopod lineage. Interestingly, the genes for eggcase matrix proteins  
414 were also found in the genome of *O. bimaculoides*, and thus, when considered altogether,  
415 supported our hypothesis suggested previously, saying the argonaut octopods recruited many  
416 proteins unrelated to the shell formation and used them for their eggcase (Setiamarga et al.,  
417 2021b). However, very interestingly, some proteins related to calcification such as the Pif-  
418 like LamG3, seemed to be used at least by *A. hians* (Setiamarga et al., 2021b).

419 In that previous study, we arbitrarily categorized the Pif-like proteins mostly identified as  
420 Conchiferan shell matrix proteins into three paralogous groups, based on three monophyletic  
421 clades recovered in the phylogeny (see Figure 5 in Setiamarga et al., 2021b), which were also  
422 recovered in this study (Figure 5). We arbitrarily named them Blue Mussel Shell Protein  
423 (BMSP), Laminin G3 (LamG3), and Pif, and called them altogether the BMSP/LamG3/Pif  
424 proteins. These proteins could be distinguished by their domain combinations. BMSP was  
425 first identified as SMPs in the blue mussel *Mytilus galloprovincialis* and *L. gigantea*,  
426 respectively (Suzuki et al. 2011; Marie et al. 2017). The protein has one Chitin-Binding  
427 (ChtBd) and multiple (three or four) von Willebrand factor type A (VWA) domains. BMSP is  
428 present throughout the nacreous layer with dense localization in the myostracum, suggesting  
429 its possible role in Conchiferan nacreous layer formation (Suzuki et al. 2011). Meanwhile, Pif  
430 proteins, which was originally found in the nacre of *P. fucata*, usually have two types of  
431 domains, one VWA and two ChtBd domains, but with a different domain compositions and

432 arrangements (Figure 5) (Suzuki et al. 2009; Setiamarga et al., 2021a, b). *In vitro* functional  
433 analysis has shown that it is involved in calcium crystallization (Suzuki et al. 2013).

434 We did not detect any of the homologs of Pif and BMSP in the eggcase matrix of the  
435 argonauts in our previous multi-omics eggcase matrix protein study (Setiamarga et al.,  
436 2021b), nor in the shell matrix protein study of *Nautilus* (Setiamarga et al., 2021a). LamG3  
437 was first identified by Marie et al. (2017) as one of the two Pif-like isoforms composed of the  
438 one VWA, three ChtBd, and one LamG domains. In both cephalopods, we instead found the  
439 last type of Pif homologs (*sensu* Setiamarga et al., 2021b), the LamG3 protein, in both the  
440 eggcase matrix of *A. hians* (but not in the eggcase matrix proteome and transcriptome of *A.*  
441 *argo*), and the shell matrix of *Nautilus*. However, very interestingly, differing with the results  
442 of our previous multi-omics study (Setiamarga et al., 2021b), in this study, we found the  
443 presence of *lamG3* in the genome of *A. argo* (Aargo013232) (Figure 5). Further studies must  
444 thus be conducted to assess if the absence of any transcript/protein product of *lamG3* in *A.*  
445 *argo*, despite its presence on the genome, is an artifact caused by the possible non-  
446 exhaustiveness of our previous multi-omics study, or if it is not used in the eggcase matrix of  
447 *A. argo*, making the eggcases of the two congeneric species different in nature.

448 At present, however, we are working under the hypothesis that this protein is a key protein  
449 for the formation of calcified eggcases in argonaut octopods, because it is one of the putative  
450 paralogs of the BMSP/LamG3/Pif-like proteins, which members have been identified as  
451 major component of the shell of Conchiferan mollusks. Intriguingly, however, although in the  
452 previous multi-omics study we did not find any sequence of *pif* or *BMSP* both in the  
453 transcriptome data of all tissues studied and the proteome data of *A. argo*, we found the  
454 presence of an intact coding sequence of *pif* in the genome of the species (Aargo018021).  
455 More interestingly, an intact *pif* sequence was also found in the genome of *N. pompilius*  
456 (Huang et al. 2021), although the sequence was not found in the transcriptome and proteome

457 data of our recent shell matrix proteins multi-omics study of the species (Setiamarga et al.,  
458 2021a). The exon-intron structures of each cluster are different and are located at different  
459 positions in the genome of both *A. argo* (Figure 5b) and *Nautilus*. Meanwhile, LamG3 has  
460 also been shown to be associated with the biomineralization of shells in the pond snail  
461 *Lymnaea stagnalis*, although no BMSP nor Pif were apparently found in its shell matrix  
462 proteome and transcriptome, although additional studies involving genome analysis of the  
463 species is still needed to confirm this observation (Ishikawa et al. 2020). These results seem  
464 to thus indicate that the two Pif homologs (*pif* and *lamG3*) were probably already present  
465 separately at least in the basal Conchiferan mollusks. However, ancestral Cephalopods even  
466 more basal than the *Nautilus* probably lost *bmsp*, retained *lamG3* and *pif*, but use only *lamG3*  
467 for the formation of biomineralized shells. Although further confirmation is still needed,  
468 *lamG3* was probably recruited independently as an SMP, independently in each lineage  
469 leading to terrestrial gastropods and cephalopods. The presence of *pif* in the genomes of  
470 *Nautilus* and *A. argo*, and *lamG3* in the genome of *O. bimaculoides*, even though they are not  
471 involved in the formation of shells or shell-like structures, is probably because they acquired  
472 new functions unrelated to shell formation.

473 The lack of a typical LamG3 domain in BMSP and Pif have been reported (Suzuki et al.,  
474 2013), and domain searches using various tools such as SMART ([http://smart.embl-](http://smart.embl-heidelberg.de/)  
475 [heidelberg.de/](http://smart.embl-heidelberg.de/), accessed in June 2021), InterProScan  
476 (<https://www.ebi.ac.uk/interpro/search/sequence/>, accessed in June 2021), and Pfam  
477 (<http://pfam.xfam.org/>, accessed in June 2021) seemed to support this notion. In both BMSP  
478 and Pif, no domain was detected. Some searches would detect only the repetitive low-  
479 complexity domains (RLCD) which designates a possibility that the particular region used to  
480 have a domain, but has probably degraded down and thus only recognizable partially at the  
481 sequence level (Suzuki et al., 2017; Setiamarga et al., 2021a; b). We also predicted the

482 stereostructures of some representatives of BMSP (*Mytilus galloprovincialis*), Pif (*A. argo*,  
483 *N. pompilius*, *P. fucata*, *L. gigantea*), and LamG3 (*A. argo*, *N. pompilius*, *O. bimaculoides*, *P.*  
484 *fucata*, *L. gigantea*, *C. gigas*) using AlphaFold2 (Jumper et al., 2021), and compared their 3D  
485 structures (Figure 5). AlphaFold2 predicts accurate protein 3D structural models. Structural  
486 comparisons using such models would allow us to obtain surprising information about the  
487 function and evolution of the proteins, unattainable only through sequence comparison and  
488 comparative genomics. The models of BMSP/LamG3/Pif proteins predicted by AlphaFold2  
489 indicate that the region where no domain was detected in the proteins (except for the LamG3  
490 proteins) actually still retains enough of its LamG3 domain characteristics (Figure 5). LamG3  
491 domain is a receptor for various extracellular matrix proteins, which function is mediated by  
492 the calcium ion (Tryggvason 1993; Yurchenco et al. 1993; Yu and Talts 2003; Klees et al.,  
493 2008; Suzuki et al., 2017). This thus might explain the usefulness of the domain not only for  
494 the formation of calcified structures but also for other functions, while at the same time also  
495 suggests the unnecessary of the organisms compared to retain or use all of the  
496 BMSP/LamG3/Pif protein homologs for the same function, which might thus also explain  
497 why Cephalopods (*Nautilus*) only use LamG3 for their shell formation, and why the  
498 argonauts also re-recruited this protein to form their eggcase.

499

## 500 **Conclusion**

501 Until very recently, studies on the evolution of Cephalopoda lacked insights from genomic  
502 perspectives. However, recent genome data publications of various species have remedied  
503 this. In this study, we present a genome assembly of *Argonauta argo*, which provides  
504 significant insight into the genetic and evolutionary background of the adaptation to the  
505 pelagic environment, such as the evolution of the visual proteins Opsin and Reflectin, and the  
506 shell matrix protein Tyrosinase. The improved quality of the genome assembly also allowed

507 us to identify the presence of sexually highly polymorphic regions, which would be useful in  
508 future studies aiming at the elucidation of the genetic underpinnings of extreme male-female  
509 dimorphisms in the species. The pronounced sexual dimorphism probably evolved as an  
510 adaptation to holopelagic life in the open ocean with few male-female encounters. Besides  
511 that, the improved contiguity of the genome assembly confirmed the presence of several gene  
512 clusters including both deeply conserved ones, such as Hox, ParaHox, and Wnt, and unique  
513 ones that might be involved in evolutionary novelty.

514 The newly obtained draft genome sequence also allowed us to hypothesize about the  
515 evolution of some major shell matrix proteins related to calcification, seemingly re-recruited  
516 in the formation of the eggcase, which was impossible to do in our previous multi-omics-  
517 based studies. We also were able to corroborate our previous report based on a multi-omics  
518 study on the eggcase matrix proteins. In this study, we found all of the eggcase matrix  
519 proteins previously identified, while at the same time, also found the presence of LamG3 in  
520 the genome of *A. argo* (and *O. bimaculoides*), which was found as one of the eggcase matrix  
521 proteins of *A. hians* but not in *A. argo* in our previous multi-omics study. We also found an  
522 ortholog of the Pif coding gene in the genome of *A. argo*, besides in the recently published  
523 genome of *N. pompilius*. Combined with the protein structure prediction using Alphafold2,  
524 we thus were able to build a hypothesis about how BMSP/LamG3/Pif proteins evolved. In  
525 our hypothesis, the BMSP/LamG3/Pif proteins are key proteins for the formation of calcified  
526 external structures, including the eggcase. Therefore, the presence of *pif* in the genomes of  
527 *Nautilus* and *A. argo* and *lamG3* in the genome of *O. bimaculoides* might explain the  
528 usefulness of LamG3 domain for the formation of calcified structures, which might thus  
529 explain why the argonauts also re-recruited LamG3 protein, although not necessarily Pif and  
530 BMSP, to form their eggcases.

531

## 532 **Materials and Methods**

### 533 *Sampling, Sequencing, and Genome Size Estimation*

534 The *A. argo* DNA used for sequencing was derived from a single female provided by  
535 bycatch caught in the fixed nets set along the coast in Oki Island Town, Shimane Prefecture,  
536 Japan (36°17'20.6"N 133°12'46.4"E). Pieces of the gonad (ovary) were collected from an  
537 individual female specimen collected in 2018. The shell is registered as a collection of The  
538 University Museum, The University of Tokyo in Tokyo, Japan (Voucher No. RM33391).  
539 Genomic DNA was extracted from the ovary using the QIAGEN Genomic-tip kit. Pooled  
540 DNA was used for the preparation of three paired-end and three mate-pair (3, 6, 10, and 15  
541 kbp insert size) libraries, that were sequenced on an Illumina HiSeq 2500 at the National  
542 Institute of Genetics, Japan with supports by Platform for Advanced Genome Science  
543 (PAGS) (Table S6, S7).

544 Pieces of the mantle, arm membrane of the first arm, and 2nd arm tip were obtained from  
545 the same single individual to genomic DNA. Eyes, hearts, and gill hearts were sampled from  
546 different individuals of *A. argo*. Six transcriptomes of *A. argo* were obtained and raw data  
547 statistics are provided in Table S6. Total RNA was extracted from the tissue samples using  
548 Trizol (Invitrogen) followed by an on-column DNaseI treatment using the RNeasy mini kit  
549 (Qiagen). The RNA acquoliot was stored at -80°C until further transcriptome analyses.

550 The *A. argo* genome size and heterozygosity were assessed with GenomeScope v2.0 (Ranallo-  
551 Benavidez et al. 2020), based on the quality-filtered Illumina reads. A heterozygosity rate of  
552 1.44% was estimated from the 32-mer-based assessment of the *A. argo* genome  
553 (Supplementary Figure S1). Complete microsatellite sequences were estimated and visualized  
554 with Krait v1.3.3 (Du et al. 2018b).

555 Raw read sequence data will be available in the DNA Data Bank of Japan (DDBJ). We are  
556 willing to share our raw data before the publication of the original paper on the assumption

557 that it will be done as a collaborative research.

558

### 559 *De Novo Genome Assembly and Annotation*

560 Using the predicted 1.1 Gb genome size estimate of the *A. argo*, the total raw sequence  
561 coverage of Illumina reads was 201× (pair-end reads, 3 kb, 6 kb, 10kb, and 15 kb mate-paired  
562 libraries). To reconstruct the mitogenome, we performed contig assembly (-n 200) with  
563 Platanus v1.2.4 (Kajitani et al. 2014) using the paired-end data. Contigs annotated as  
564 mitochondrial sequences were extracted by using the mitogenome data of a closely related  
565 species, *A. hians* (NC\_036354), as the query for BLASTn homology search. After assembling  
566 the contigs, both ends of the resulting single contig were manually confirmed to overlap, and  
567 redundant parts were removed to complete the full circular mitogenome.

568 The pair-end sequence reads (PE600) after adapter trimming were assembled using De  
569 Bruijn graph assembler, Platanus-alley v. 2.2.2 (Kajitani et al. 2019). The basic algorithm of  
570 the Platanus-alley v2.2.2 is based on the arrangement of two independently assembled  
571 sequences derived from each haplotype of the corresponding two homologous chromosomes.  
572 Contig assembly was performed using only the PE library, and then scaffolding and gap  
573 closure were performed using all libraries. Assembly statistics by Platanus v222 was shown  
574 in Table S8.

575 Gene prediction models were generated using custom-made annotation pipeline as in  
576 (Inoue et al. 2021). In brief, this pipeline combines RNA-seq-based prediction results,  
577 homology-based prediction results for related species, and ab initio prediction results using  
578 in-house dynamic program. RNA-seq based prediction utilized both the assembly-first  
579 method and the mapping-first method. For the assembly-first method, RNA-seq data were  
580 assembled using Trinity (Grabherr et al. 2011) and Oases (Schulz et al. 2012). Then,  
581 assembled contigs were splice-mapped with GMAP (Wu et al. 2005). For the mapping-first



582 method, RNA-seq data were mapped to genome scaffolds and genes were predicted using  
583 HISAT2 (Kim et al. 2019) and StringTie (Petea et al. 2016). In terms of homology-based  
584 prediction, amino acid sequences of *Octopus vulgaris* (Zarrella et al. 2019), *Octopus*  
585 *bimaculoides* (Albertin et al. 2015), *Architeuthis dux* (da Fonseca et al. 2020), *Crassostrea*  
586 *giga* (Zhang et al. 2012), and *Mizuhopecten yessoensis* (Wang et al. 2017), were spliced-  
587 mapped to genome scaffolds using Spaln62, and gene sets were predicted. For ab initio  
588 prediction, raining sets were selected from RNA-seq based prediction results and  
589 AUGUSTUS (Stanke et al. 2003) and SNAP (Korf et al. 2004) were trained and used for  
590 prediction. Predicted results of each tool are shown in Table S9 and as a final result, 20,293  
591 protein coding genes were predicted (Table S9). Predicted genes were evaluated using  
592 BUSCO v3.0.2 (protein mode) (Simão et al. 2015) and resulted in 97.0% complete gene  
593 marked, suggesting high accuracy of the annotation (Table S10). This goes beyond the  
594 cephalopod genomes sequenced so far, and is comparable to high quality mollusc genomes  
595 (Table S11).

596

### 597 *Phylogenetic Analysis*

598 Phylogenetic analyses were conducted on a total of five gene families obtained in this  
599 study (*Hox*, *reflectin*, *tyrosinase*, *opsin*, *bmsp/lamg3/pif* proteins). To build single-gene trees  
600 based on orthologs, we performed webBLAST search using *A. argo* protein sequences  
601 translated from the gene sequences. Sequences for the phylogenetic tree were collected from  
602 Genbank to cover the whole Lophotrochozoan clade. To perform multiple alignments of  
603 protein sequences, we utilized the online version of MAFFT v7.487 (Kato et al. 2002;  
604 <https://mafft.cbrc.jp/alignment/software/>; accessed in August 2021), followed by the removal  
605 of ambiguously aligned sites using the online version of trimAl\_v1.4beta (automated option)  
606 (Capella-Gutiérrez et al. 2009; <http://phylemon2.bioinfo.cipf.es/index.html>; accessed in

607 August 2021). Maximum likelihood phylogenetic inferences were executed on the software  
608 RAxMLGUI v2.0.5 (Silvestro et al. 2012; Stamatakis 2006) the rapid tree search setting with  
609 1000 bootstrap replications under the best fit models (BMSP/LamG3/Pif proteins = WAG +  
610  $\Gamma$ , Hox = LG +  $\Gamma$  + I, Reflectin = JTT +  $\Gamma$  + F, Tyrosinase = LG +  $\Gamma$  + I). The best fit models  
611 were inferred using MEGA X (Kumar et al. 2018). Obtained trees were visualized with  
612 FigTree v1.4.2 (Rambaut 2009).

613 For Opsin, sequences from other metazoans were collected from GenBank and Ensembl  
614 databases. Multiple sequence alignments of protein sequences were also performed by  
615 MAFFT. The best fit models were inferred using Modeltest (Darriba et al. 2020). Maximum  
616 likelihood phylogenetic inferences were executed on the software IQ-TREE (ref) the tree  
617 search setting with 1000 bootstrap replications under the best fit models (LG+G4: Best-fit  
618 model according to Bayesian Information Criterion (BIC) for c-opsins, LG+F+I+G4: BIC for  
619 r-opsins). The trees were visualized with FigTree v1.4.2 (Rambaut 2009).

620

## 621 **Acknowledgments**

622 Samples were obtained with the courtesy of Mr. Minoru Yoshida and his colleagues of  
623 Yoshida Suisan, Oki Islands. Drs. Noriyoshi Sato of Tokai University and Hiroki Ono of  
624 Shimane University contributed to sample collections. Computations were partially  
625 performed on the NIG supercomputer at ROIS National Institute of Genetics, Shizuoka,  
626 Japan. We are grateful to Drs. Kazutoshi Yoshitake and Takeshi Kawashima for their help on  
627 how to use the Singularity module on the NIG supercomputer system. DHES, HK, and TS  
628 would like to thank members of Setiamarga Lab at National Institute of Technology,  
629 Wakayama College, and Sasaki Lab at The University Museum of The University of Tokyo,  
630 for their constant support during the commencement of the study.

631 The work was supported by Human Frontier Science Program grant (RGP0060/2017) to

632 MAY, Japan Society for the Promotion of Science (JSPS) KAKENHI Grant Number  
633 18K06363 (Grant-in-Aid for Scientific Research (C))] to MAY and DHES and 16H06279  
634 (PAGS) to AT and TI. DHES was also supported by the FY2016 Research Grant for  
635 Chemistry and Life Sciences (The Asahi Glass Foundation), and partially supported by the  
636 FY2017 Research Grant for Zoology (Fujiwara Natural History Research Foundation) and  
637 the FY2019 Grant-in-Aid for Challenging (Exploratory) Research (Grant number:  
638 19K21646) (awarded to TS (PI) and DHES (Co-PI)). KI was partially supported by the  
639 Platform Project for Supporting Drug Discovery and Life Science Research from the  
640 Japanese Agency for Medical Research and Development (AMED). We also thank the  
641 faculty of Life and Environmental Science at Shimane University for help in financial  
642 support for publishing this report.

643

## 644 **References**

- 645 Addadi, L., Joester, D., Nudelman, F. & Weiner, S. Mollusk shell formation: a source of new  
646 concepts for understanding biomineralization processes. *Chemistry* 12, 980–987 (2006)
- 647 Albertin, C. B. et al. The octopus genome and the evolution of cephalopod neural and  
648 morphological novelties. *Nature* 524, 220–224 (2015)
- 649 Alon, S. et al. The majority of transcripts in the squid nervous system are extensively recoded  
650 by A-to-I RNA editing. *Elife* 4, (2015)
- 651 Ascencio, D. et al. Expression attenuation as a mechanism of robustness against gene  
652 duplication. *Proc. Natl. Acad. Sci. U. S. A.* 118, (2021)
- 653 Bai, Y., Nie, H., Wang, Z. & Yan, X. Genome-wide identification and transcriptome-based  
654 expression profiling of Wnt gene family in *Ruditapes philippinarum*. *Comp. Biochem.*  
655 *Physiol. Part D Genomics Proteomics* 35, 100709 (2020)
- 656 Belcaid, M. et al. Symbiotic organs shaped by distinct modes of genome evolution in

- 657 cephalopods. Proc. Natl. Acad. Sci. U. S. A. 116, 3030–3035 (2019)
- 658 Bello, G. Exaptations in Argonautoidea (Cephalopoda: Coleoidea: Octopoda). Neues  
659 Jahrbuch für Geologie und Paläontologie - Abhandlungen 266, 85–92 (2012)
- 660 Bizikov, V. A. The shell in Vampyropoda (Cephalopoda): Morphology, functional role and  
661 evolution. 3, 1–88 (2004)
- 662 Bonadè, M., Ogura, A., Corre, E., Bassaglia, Y. & Bonnaud-Ponticelli, L. Diversity of Light  
663 Sensing Molecules and Their Expression During the Embryogenesis of the Cuttlefish  
664 (*Sepia officinalis*). Front. Physiol. 11, 521989 (2020)
- 665 Brain, P. F. The Brain and Lives of Cephalopods. By Marion Nixon and John Z. Young, 2003  
666 (Oxford: Oxford University Press) [xiv + 392 p with numerous bw photographs,  
667 photomicrographs and line drawings]. Price £175 (hbk). ISBN 0-19-852761-6. J. Nat.  
668 Hist. 39, 863–863 (2005)
- 669 Brooke, N. M., Garcia-Fernández, J. & Holland, P. W. The ParaHox gene cluster is an  
670 evolutionary sister of the Hox gene cluster. Nature 392, 920–922 (1998)
- 671 Capella-Gutiérrez, S., Silla-Martínez, J. M. & Gabaldón, T. trimAl: a tool for automated  
672 alignment trimming in large-scale phylogenetic analyses. Bioinformatics 25, 1972–1973  
673 (2009)
- 674 Chiu, Y.-W., Chang, C.-W., Lin, H.-D. & Shen, K.-N. The complete mitogenome of the  
675 winged argonaut *Argonauta hians* and its phylogenetic relationships in Octopoda. Conserv.  
676 Genet. Resour. 10, 359–362 (2018)
- 677 Cho, S.-J., Vallès, Y., Giani, V. C., Jr, Seaver, E. C. & Weisblat, D. A. Evolutionary  
678 dynamics of the wnt gene family: a lophotrochozoan perspective. Mol. Biol. Evol. 27,  
679 1645–1658 (2010)
- 680 Crookes, W. J. et al. Reflectins: The Unusual Proteins of Squid Reflective Tissues. Science  
681 (2004) doi:10.1126/science.1091288

- 682 da Fonseca, R. R. et al. A draft genome sequence of the elusive giant squid, *Architeuthis dux*.  
683 *Gigascience* 9, (2020)
- 684 Darriba, D. et al. ModelTest-NG: A New and Scalable Tool for the Selection of DNA and  
685 Protein Evolutionary Models. *Mol. Biol. Evol.* 37, 291–294 (2020)
- 686 DeMartini, D. G., Izumi, M., Weaver, A. T., Pandolfi, E. & Morse, D. E. Structures,  
687 Organization, and Function of Reflectin Proteins in Dynamically Tunable Reflective Cells.  
688 *J. Biol. Chem.* 290, 15238–15249 (2015)
- 689 Du, J. et al. Wnt gene family members and their expression profiling in *Litopenaeus*  
690 *vannamei*. *Fish Shellfish Immunol.* 77, 233–243 (2018)
- 691 Du, L. et al. Krait: an ultrafast tool for genome-wide survey of microsatellites and primer  
692 design. *Bioinformatics* 34, 681–683 (2018)
- 693 Dyachuk, V. Extracellular matrix components in Bivalvia: Shell and ECM components in  
694 developmental and adult tissues. *Fish. Aquac. J.* 09, (2018)
- 695 Döring, C. C., Kumar, S., Tumu, S. C., Kourtesis, I. & Hausen, H. The visual pigment  
696 xenopsin is widespread in protostome eyes and impacts the view on eye evolution. *Elife* 9,  
697 (2020)
- 698 Edgar, R. C. MUSCLE: multiple sequence alignment with high accuracy and high  
699 throughput. *Nucleic Acids Res.* 32, 1792–1797 (2004)
- 700 Feng, D., Li, Q., Yu, H., Kong, L. & Du, S. Identification of conserved proteins from diverse  
701 shell matrix proteome in *Crassostrea gigas*: characterization of genetic bases regulating  
702 shell formation. *Sci. Rep.* 7, 45754 (2017)
- 703 Finn, J. K. & Norman, M. D. The argonaut shell: gas-mediated buoyancy control in a pelagic  
704 octopus. *Proc. Biol. Sci.* 277, 2967–2971 (2010)
- 705 Force, A. et al. Preservation of duplicate genes by complementary, degenerative mutations.  
706 *Genetics* 151, 1531–1545 (1999)

- 707 Garstang, M. & Ferrier, D. E. K. Time is of the essence for ParaHox homeobox gene  
708 clustering. *BMC Biol.* 11, 72 (2013)
- 709 Gaunt, S. J. The significance of Hox gene collinearity. *Int. J. Dev. Biol.* 59, 159–170 (2015)
- 710 Grabherr, M. G. et al. Full-length transcriptome assembly from RNA-Seq data without a  
711 reference genome. *Nat. Biotechnol.* 29, 644–652 (2011)
- 712 Graham, A., Papanicolaou, N. & Krumlauf, R. The murine and *Drosophila* homeobox gene  
713 complexes have common features of organization and expression. *Cell* 57, 367–378  
714 (1989)
- 715 Gregory, T.R. (2021). Animal Genome Size Database. <http://www.genomesize.com>.
- 716 Hallin, J. & Landry, C. R. Regulation plays a multifaceted role in the retention of gene  
717 duplicates. *PLoS biology* vol. 17 e3000519 (2019)
- 718 Hahn, M. W. Distinguishing among evolutionary models for the maintenance of gene  
719 duplicates. *J. Hered.* **100**, 605–617 (2009)
- 720 Hirota, K., Yoshida, M.-A., Itoh, T., Toyoda, A. & Setiamarga, D. H. E. The full  
721 mitochondrial genome sequence of the greater argonaut *Argonauta argo* (Cephalopoda,  
722 *Argonautoidea*) and its phylogenetic position in Octopodiformes. *Mitochondrial DNA B*  
723 *Resour* 6, 1451–1453 (2021)
- 724 Holstein, T. W. The evolution of the Wnt pathway. *Cold Spring Harb. Perspect. Biol.* 4,  
725 a007922 (2012)
- 726 Huang, Z. et al. Genomic insights into the adaptation and evolution of the nautilus, an ancient  
727 but evolving ‘living fossil’. *Mol. Ecol. Resour.* (2021) doi:10.1111/1755-0998.13439
- 728 Inoue, K. et al. Genomics and Transcriptomics of the green mussel explain the durability of  
729 its byssus. *Sci. Rep.* 11, 5992 (2021)
- 730 Ishikawa, A. et al. Functional shell matrix proteins tentatively identified by asymmetric snail  
731 shell morphology. *Sci. Rep.* 10, 9768 (2020)

- 732 Jackson, D. J. et al. Parallel evolution of nacre building gene sets in molluscs. *Mol. Biol.*  
733 *Evol.* 27, 591–608 (2010)
- 734 Jackson, D. J. et al. Variation in Orthologous Shell-Forming Proteins Contribute to  
735 Molluscan Shell Diversity. *Mol. Biol. Evol.* 34, 2959–2969 (2017)
- 736 Janssen, R. et al. Conservation, loss, and redeployment of Wnt ligands in protostomes:  
737 implications for understanding the evolution of segment formation. *BMC Evol. Biol.* 10,  
738 374 (2010)
- 739 Jumper, J. et al. Highly accurate protein structure prediction with AlphaFold. *Nature* 596,  
740 583–589 (2021)
- 741 Kajitani, R. et al. Platanus-allee is a de novo haplotype assembler enabling a comprehensive  
742 access to divergent heterozygous regions. *Nat. Commun.* 10, 1702 (2019)
- 743 Kim, D., Paggi, J. M., Park, C., Bennett, C. & Salzberg, S. L. Graph-based genome alignment  
744 and genotyping with HISAT2 and HISAT-genotype. *Nat. Biotechnol.* 37, 907–915 (2019)
- 745 Klees, R. F. et al. Dissection of the osteogenic effects of laminin-332 utilizing specific LG  
746 domains: LG3 induces osteogenic differentiation, but not mineralization. *Exp. Cell Res.*  
747 314, 763–773 (2008)
- 748 Kocot, K. M., Aguilera, F., McDougall, C., Jackson, D. J. & Degnan, B. M. Sea shell  
749 diversity and rapidly evolving secretomes: insights into the evolution of biomineralization.  
750 *Front. Zool.* 13, 23 (2016)
- 751 Kozlov, A. M., Darriba, D., Flouri, T., Morel, B. & Stamatakis, A. RAxML-NG: a fast,  
752 scalable and user-friendly tool for maximum likelihood phylogenetic inference.  
753 *Bioinformatics* 35, 4453–4455 (2019)
- 754 Kröger, B., Vinther, J. & Fuchs, D. Cephalopod origin and evolution: A congruent picture  
755 emerging from fossils, development and molecules: Extant cephalopods are younger than  
756 previously realised and were under major selection to become agile, shell-less predators.

- 757 Bioessays 33, 602–613 (2011)
- 758 Levenson, R., DeMartini, D. G. & Morse, D. E. Molecular mechanism of reflectin's tunable  
759 biophotonic control: Opportunities and limitations for new optoelectronics. *APL Materials*  
760 5, 104801 (2017)
- 761 Li, F. et al. Chromosome-level genome assembly of the East Asian common octopus  
762 (*Octopus sinensis*) using PacBio sequencing and Hi-C technology. *Mol. Ecol. Resour.* 20,  
763 172–1582 (2020)
- 764 Liscovitch-Brauer, N. et al. Trade-off between Transcriptome Plasticity and Genome  
765 Evolution in Cephalopods. *Cell* 169, 191–202.e11 (2017)
- 766 Liu, J., Xu, F., Ji, P., Li, L. & Zhang, G. Evolutionary dynamics of the Wnt gene family:  
767 implications for lophotrochozoans. *Journal of Oceanology and Limnology* 36, 1720–1730  
768 (2018)
- 769 Lowenstam, H. A. & Weiner, S. On Biomineralization. in *On Biomineralization* (Oxford  
770 University Press, 2020). doi:10.1093/oso/9780195049770.001.0001
- 771 Lynch, M. & Force, A. The probability of duplicate gene preservation by  
772 subfunctionalization. *Genetics* 154, 459–473 (2000)
- 773 Mann, K., Edsinger-Gonzales, E. & Mann, M. In-depth proteomic analysis of a mollusc shell:  
774 acid-soluble and acid-insoluble matrix of the limpet *Lottia gigantea*. *Proteome Sci.* 10, 28  
775 (2012)
- 776 Marie, B. et al. Different secretory repertoires control the biomineralization processes of  
777 prism and nacre deposition of the pearl oyster shell. *Proc. Natl. Acad. Sci. U. S. A.* 109,  
778 20986–20991 (2012)
- 779 Marie, B. et al. Deep conservation of bivalve nacre proteins highlighted by shell matrix  
780 proteomics of the Unionoida *Elliptio complanata* and *Villosa lienosa*. *J. R. Soc. Interface*  
781 14, (2017)



- 782 Marie, B. et al. Evolution of nacre: biochemistry and proteomics of the shell organic matrix  
783 of the cephalopod *Nautilus macromphalus*. *Chembiochem* 10, 1495–1506 (2009)
- 784 Marin, F. et al. Skeletal Organic Matrices in Molluscs: Origin, Evolution, Diagenesis. in  
785 *Biomineralization* 325–332 (Springer Singapore, 2018). doi:10.1007/978-981-13-1002-  
786 7\_34
- 787 McDougall, C., Aguilera, F. & Degnan, B. M. Rapid evolution of pearl oyster shell matrix  
788 proteins with repetitive, low-complexity domains. *J. R. Soc. Interface* 10, 20130041  
789 (2013)
- 790 Mitchell, P. R., Phakey, P. P. & Rachinger, W. A. Ultrastructural Observations of the  
791 Argonaut Shell. *Scanning Microsc.* 8, 4 (1994)
- 792 Miyamoto, H. et al. The diversity of shell matrix proteins: genome-wide investigation of the  
793 pearl oyster, *Pinctada fucata*. *Zoolog. Sci.* 30, 801–816 (2013)
- 794 Montavon, T. HoxGenes: Embryonic Development. eLS 1–8 (2015)  
795 doi:10.1002/9780470015902.a0005046.pub2
- 796 Morel, G. et al. Differential gene retention as an evolutionary mechanism to generate  
797 biodiversity and adaptation in yeasts. *Sci. Rep.* 5, 11571 (2015)
- 798 Naef A, 1923. *Cephalopoda. Fauna e Flora del Golfo di Napoli* (Translated from German by  
799 the Israel Program for Scientific Translations, Jerusalem, 1972). Monograph 35.
- 800 Norman M. 2000. *Cephalopods a world guide Octopuses, Argonauts, Cuttlefish, Squid,*  
801 *Nautilus*. 320pp. ConchBooks
- 802 Oudot, M. et al. The shell matrix and microstructure of the Ram’s Horn squid: Molecular and  
803 structural characterization. *J. Struct. Biol.* 211, 107507 (2020)
- 804 Packard, A. & Wurtz, M. An octopus, *Ocythoe*, with a swimbladder and triple jets. *Philos.*  
805 *Trans. R. Soc. Lond. B Biol. Sci.* 344, 261–275 (1994)
- 806 Passamaneck, Y. J., Furchheim, N., Hejnol, A., Martindale, M. Q. & Lüter, C. Ciliary

- 807 photoreceptors in the cerebral eyes of a protostome larva. *Evodevo* 2, 6 (2011)
- 808 Peñaloza, C. et al. A chromosome-level genome assembly for the Pacific oyster *Crassostrea*  
809 *gigas*. *Gigascience* 10, (2021)
- 810 Powers, T. P. et al. Characterization of the Hox cluster from the mosquito *Anopheles*  
811 *gambiae* (Diptera: Culicidae). *Evol. Dev.* 2, 311–325 (2000)
- 812 Ramirez, M. D. et al. The Last Common Ancestor of Most Bilaterian Animals Possessed at  
813 Least Nine Opsins. *Genome Biol. Evol.* 8, 3640–3652 (2016)
- 814 Ramirez, M. D. & Oakley, T. H. Eye-independent, light-activated chromatophore expansion  
815 (LACE) and expression of phototransduction genes in the skin of *Octopus bimaculoides*. *J.*  
816 *Exp. Biol.* 218, 1513–1520 (2015)
- 817 Ranallo-Benavidez, T. R., Jaron, K. S. & Schatz, M. C. GenomeScope 2.0 and Smudgeplot  
818 for reference-free profiling of polyploid genomes. *Nat. Commun.* 11, 1432 (2020)
- 819 Rawlinson, K. A. et al. Extraocular, rod-like photoreceptors in a flatworm express xenopsin  
820 photopigment. *Elife* 8, (2019)
- 821 Revelle, R. & Fairbridge, R. W. Carbonates and carbon dioxide. (Geological Society of  
822 America, 1957).
- 823 Robertson, L. K. & Mahaffey, J. W. Insect Homeotic Complex Genes and Development,  
824 Lessons From *Drosophila* and Beyond☆. in Reference Module in Life Sciences (Elsevier,  
825 2017). doi:10.1016/B978-0-12-809633-8.04008-5
- 826 Sakurai, T. & Kawano, S. Argonautidae (Cephalopoda) obtained from set nets off the  
827 Shimane Peninsula, southwestern part of the Japan Sea during summer, 2009. 8, 41–46  
828 (2010)
- 829 Sanchez, G. et al. Genus-level phylogeny of cephalopods using molecular markers: current  
830 status and problematic areas. *PeerJ* 6, e4331 (2018)
- 831 Saul, L. R. & Stadum, C. J. Fossil argonauts (Mollusca: Cephalopoda: Octopodida) from Late

- 832 Miocene Siltstones of the Los Angeles Basin, California. *J. Paleontol.* 79, 520–531 (2005)
- 833 Scales, H. *Spirals in Time: The Secret Life and Curious Afterlife of Seashells.* (Bloomsbury  
834 Publishing, 2015).
- 835 Schulz, M. H., Zerbino, D. R., Vingron, M. & Birney, E. Oases: robust de novo RNA-seq  
836 assembly across the dynamic range of expression levels. *Bioinformatics* 28, 1086–1092  
837 (2012)
- 838 Setiamarga, D. H. E. et al. Hydrophilic Shell Matrix Proteins of *Nautilus pompilius* and The  
839 Identification of a Core Set of Conchiferan Domains. *bioRxiv* 2020.11.14.382804 (2020)  
840 doi:10.1101/2020.11.14.382804
- 841 Setiamarga, D. H. E. et al. Independent adoptions of a set of proteins found in the matrix of  
842 the mineralized shell-like eggcase of Argonaut octopuses. *bioRxiv* 2021.07.10.451900  
843 (2021) doi:10.1101/2021.07.10.451900
- 844 Setiamarga, D. H. E. et al. An in-silico genomic survey to annotate genes coding for early  
845 development-relevant signaling molecules in the pearl oyster, *Pinctada fucata*. *Zoolog. Sci.*  
846 30, 877–888 (2013)
- 847 Shippy, T. D. et al. Analysis of the *Tribolium* homeotic complex: insights into mechanisms  
848 constraining insect Hox clusters. *Dev. Genes Evol.* 218, 127–139 (2008)
- 849 Simakov, O. et al. Insights into bilaterian evolution from three spiralian genomes. *Nature*  
850 493, 526–531 (2013)
- 851 Simão, F. A., Waterhouse, R. M., Ioannidis, P., Kriventseva, E. V. & Zdobnov, E. M.  
852 BUSCO: assessing genome assembly and annotation completeness with single-copy  
853 orthologs. *Bioinformatics* 31, 3210–3212 (2015)
- 854 Song, X.-M. et al. Preferential gene retention increases the robustness of cold regulation in  
855 Brassicaceae and other plants after polyploidization. *Hortic Res* 7, 20 (2020)
- 856 Stanke, M. & Waack, S. Gene prediction with a hidden Markov model and a new intron

- 857 submodel. *Bioinformatics* 19 Suppl 2, ii215–25 (2003)
- 858 Stevens, K., Iba, Y., Suzuki, A. & Mutterlose, J. Biological and environmental signals  
859 recorded in shells of *Argonauta argo* (Cephalopoda, Octobranchia) from the Sea of Japan.  
860 *Mar. Biol.* 162, (2015)
- 861 Strugnell, J., Jackson, J., Drummond, A. J. & Cooper, A. Divergence time estimates for  
862 major cephalopod groups: evidence from multiple genes. *Cladistics* 22, 89–96 (2006)
- 863 Sugino, R. P. & Innan, H. Selection for more of the same product as a force to enhance  
864 concerted evolution of duplicated genes. *Trends Genet.* 22, 642–644 (2006)
- 865 Suzuki, M., Iwashima, A., Kimura, M., Kogure, T. & Nagasawa, H. The molecular evolution  
866 of the pif family proteins in various species of mollusks. *Mar. Biotechnol.* 15, 145–158  
867 (2013)
- 868 Suzuki, M. et al. Identification and characterisation of a calcium carbonate-binding protein,  
869 blue mussel shell protein (BMSP), from the nacreous layer. *Chembiochem* 12, 2478–2487  
870 (2011)
- 871 Suzuki, M., Kogure, T. & Nagasawa, H. Studies on the chemical structures of organic  
872 matrices and their functions in the biomineralization processes of molluscan shells. *AGri-*  
873 *Biosci. Monogr.* 7, 25–39 (2017)
- 874 Suzuki, M. et al. An Acidic Matrix Protein, Pif, Is a Key Macromolecule for Nacre  
875 Formation. *Science* 325, 1388–1390 (2009)
- 876 Takeuchi, T. et al. Bivalve-specific gene expansion in the pearl oyster genome: implications  
877 of adaptation to a sessile lifestyle. *Zoological Lett* 2, 3 (2016)
- 878 Tribolium Genome Sequencing Consortium et al. The genome of the model beetle and pest  
879 *Tribolium castaneum*. *Nature* 452, 949–955 (2008)
- 880 Tryggvason, K. The laminin family. *Curr. Opin. Cell Biol.* 5, 877–882 (1993)
- 881 Vendrasco, M. J., Checa, A., Heimbrock, W. P. & Baumann, S. D. J. Nacre in Molluscs from

- 882 the Ordovician of the Midwestern United States. *Geosci. J.* 3, 1–29 (2013)
- 883 Vendrasco, M. J., Checa, A. G. & Kouchinsky, A. V. Shell microstructure of the early  
884 bivalve *Pojetaia* and the independent origin of nacre within the mollusca. *Palaeontology*  
885 54, 825–850 (2011)
- 886 Vinther, J., Sperling, E. A., Briggs, D. E. G. & Peterson, K. J. A molecular palaeobiological  
887 hypothesis for the origin of aplacophoran molluscs and their derivation from chiton-like  
888 ancestors. *Proc. Biol. Sci.* 279, 1259–1268 (2012)
- 889 Von Allmen, G. et al. Splits in fruitfly Hox gene complexes. *Nature* 380, 116 (1996)
- 890 Vöcking, O., Kourtesis, I., Tumu, S. C. & Hausen, H. Co-expression of xenopsin and  
891 rhabdomeric opsin in photoreceptors bearing microvilli and cilia. *Elife* 6, (2017)
- 892 Wagner, G. P., Amemiya, C. & Ruddle, F. Hox cluster duplications and the opportunity for  
893 evolutionary novelties. *Proc. Natl. Acad. Sci. U. S. A.* 100, 14603–14606 (2003)
- 894 Wang, S. et al. Scallop genome provides insights into evolution of bilaterian karyotype and  
895 development. *Nat Ecol Evol* 1, 120 (2017)
- 896 Wang, C. et al. Characterization of Wnt Genes in *Argopecten* Scallops and Their  
897 Involvement in Responses to Different Temperature Stresses in Bohai Red Scallops.  
898 Research Square (2021) doi:10.21203/rs.3.rs-829136/v1
- 899 Wu, T. D. & Watanabe, C. K. GMAP: a genomic mapping and alignment program for  
900 mRNA and EST sequences. *Bioinformatics* 21, 1859–1875 (2005)
- 901 Yoshida, M. A. et al. Molecular Evidence for Convergence and Parallelism in Evolution of  
902 Complex Brains of Cephalopod Molluscs: Insights from Visual Systems. *Integr. Comp.*  
903 *Biol.* 55, 1070–1083 (2015)
- 904 Yoshida, M.-A. et al. Genome structure analysis of molluscs revealed whole genome  
905 duplication and lineage specific repeat variation. *Gene* 483, 63–71 (2011)
- 906 Young, J. Z. Cephalopods and Neuroscience. *Biol. Bull.* 168, 153–158 (1985)

- 907 Young, J. Z. The anatomy of the nervous system of *Octopus vulgaris*,. (Clarendon Press,  
908 1971).
- 909 Yu, H. & Talts, J. F. Beta1 integrin and alpha-dystroglycan binding sites are localized to  
910 different laminin-G-domain-like (LG) modules within the laminin alpha5 chain G domain.  
911 *Biochem. J* 371, 289–299 (2003)
- 912 Yurchenco, P. D., Sung, U., Ward, Yamada, Y. & O’Rear, J. J. Recombinant laminin G  
913 domain mediates myoblast adhesion and heparin binding. *J. Biol. Chem.* 268, 8356–8365  
914 (1993)
- 915 Zarrella, I. et al. The survey and reference assisted assembly of the *Octopus vulgaris* genome.  
916 *Sci Data* 6, 13 (2019)
- 917 Zhang, G. et al. The oyster genome reveals stress adaptation and complexity of shell  
918 formation. *Nature* 490, 49–54 (2012)
- 919

920 **Figure legends and Tables**

921 Figure 1 The Argonaut octopuses. A. The shell-like eggcase of *Argonauta argo*. B. The shell-  
922 like eggcase of *A. hians*. C. Collect location.

923 Figure 2 Schematic representations of Hox/Parahox/Wnt clusters. A. Simplified classification  
924 of the Hox cluster genomic organization of the cephalopods with the genome sequenced.  
925 Scaffold number and length are shown for the *A. argo* genome. The gene model IDs of each  
926 gene are shown above each box. The sequences of the homeobox region were confirmed  
927 from scaffold for those gene IDs not listed. Hox2/pb and Hox4/Dfd were also not found in  
928 the *A. argo* genome as in the *O. bimaculoides* genome. B. Simplified classification of the  
929 Parahox and Wnt cluster genomic organizations of molluscs with the genome sequenced.  
930 Scaffold number and length are shown for the *A. argo* genome.

931 Figure 3 Schematic representations of reflectin clusters. A. Reflectin clusters of the octopuses.  
932 B. Gene expression levels of *A. argo* reflectins.

933 Figure 4 Schematic representations of tyrosinase clusters.

934 Figure 5 Phylogenetic relationships of Pif/Pif-like/BMSPs of Molluscs and representative 3D  
935 protein models. The maximum likelihood tree was estimated under the best fit models  
936 (WAG +  $\Gamma$ ). Numbers on the nodes are Bootstrap Support (BS) values. BS lower than 41%  
937 are shown as "--", while 100% support is not written. Representative structures of the  
938 proteins of the sequences included in the analyses, shown as SMART protein domains, are  
939 shown below the trees. Four 3D structural models (PIF; Aargo018021 [*Argonauta argo*],  
940 pfu\_aug2\_0\_956\_1\_21296\_t1 [*Pinctada fucata*], LamG3; Aargo013232 [*Argonauta argo*],  
941 Ocbimv22010162m\_p [*Octopus bimaculoides*]) were estimated with AlphaFold2.  
942 Schematic representation of domain structure and 3D structural model were colored each  
943 domain characteristic: Signal peptide, red; VWA, pale orange; 1st ChtBd, green; 2nd ChtBd,  
944 blue; 3rd ChtBd, yellow; LamG and RLCD, pink.

- 945 Figure S1 GenomeScope result.
- 946 Figure S2 Microsatellite types found in the Argonaut genome.
- 947 Figure S3 Molecular phylogenetic tree of the Hox genes. The maximum likelihood  
948 phylogenetic tree inferred under the LG +  $\Gamma$  + I model with 1000 bootstrap replicates. Hox  
949 genes of *Argonauta argo* are marked with a black arrow. Abbreviations: Nuctum: *Nucula*  
950 *tumidula*, Cragig: *Crassostrea gigas*, Pecmax: *Pecten maximus*, Gibvar: *Gibbula varia*,  
951 Lotgig: *Lottia gigantea*, Apcal: *Aplysia californica*, Eupsco: *Euprymna scolopes*, Octbim:  
952 *Octopus bimaculoides*, Naupom: *Nautilus pompilius*, Acacri: *Acanthochitona crinite*,  
953 Antent: *Antalis entails*, Glympell: *Gymnomenia pellucida*, Alivir: *Alitta virens*, Linana:  
954 *Lingula anatine*: Dromel: *Drosophila melanogaster*, Braflo: *Branchiostoma floridae*:  
955 Caelee, *Caenorhabditis elegans*.
- 956 Figure S4 Alignment of Hox genes recovered in the scaffolds but not in the gene models.
- 957 Figure S5 Reflectin phylogenetic tree
- 958 Figure S6 Reflectin alignment with reference to repetitive reflectin motifs
- 959 Figure S7 Reflectin alignment to show gene conversion
- 960 Figure S8 Tyrosinase phylogenetic tree. The maximum likelihood phylogenetic tree inferred  
961 under the LG +  $\Gamma$  + I model with 1000 bootstrap replicates. Numbers on the nodes are  
962 Bootstrap Support (BS) values. BS lower than 41% are not shown, while 100% support is  
963 shown as a black square. Tyrosinase of *Argonauta argo* are marked with underlined. Three  
964 type of tyrosinase are shown secreted ( $\alpha$ ), cytosolic ( $\beta$ ) and membrane-bound ( $\gamma$ )  
965 subclasses.
- 966 Figure S9 Tyrosinase alignment at amino acid level
- 967 Figure S10 Tyrosinase alignment to show gene conversion
- 968 Figure S11 Opsin alignment and unique amino acid changes of argonaut based on bovine  
969 rhodopsin



- 970 Figure S12 Phylogenetic tree of RGR and rhabdomeric opsins
- 971 Figure S13 Xenopsin phylogenetic tree
- 972 Figure S14-16 Protein structure of Pif/Pif-like/BMSPs. The schematic representation of three  
973 proteins of Pif/Pif-like/BMSPs are shown within the box frame. Conserved domains within  
974 each protein are predicted in SMART, and the 3D structural models were estimated with  
975 AlphaFold2. The domains regions, which distinguished by the domain prediction and its  
976 conserved alignment regions, are marked different color: Signal peptide (red), 1st VWA  
977 (deep orange), 2nd VWA (ocher), 3rd VWA (pale orange), 4th VWA (orange), 1st ChtBd  
978 (green), 2nd ChtBd (blue), 3rd ChtBd (yellow), LamG and RLCD (pink).
- 979
- 980 Table S1 Assembly comparison among molluscan genomes
- 981 Table S2 Assembly comparison based on BUSCO scores (genome mode, metazoa\_odb9,  
982 n=978)
- 983 Table S3 Krait estimation of the microsatellite regions
- 984 Table S4 Comparison of ORFs in the Hox cluster between blue mussels and giant squid
- 985 Table S5 Proteome list
- 986 Table S6 List of *A. argo* genome sequencing data
- 987 Table S7 List of *A. argo* RNA-seq sequencing data
- 988 Table S8 Assembly statistics by Platanus v222
- 989 Table S9 Gene prediction models using custom-made annotation pipeline with transcriptomic  
990 data
- 991 Table S10 Gene model comparison based on BUSCO scores (protein mode, metazoa\_odb9,  
992 n=978)
- 993 Table S11 Gene model comparison among molluscan genomes

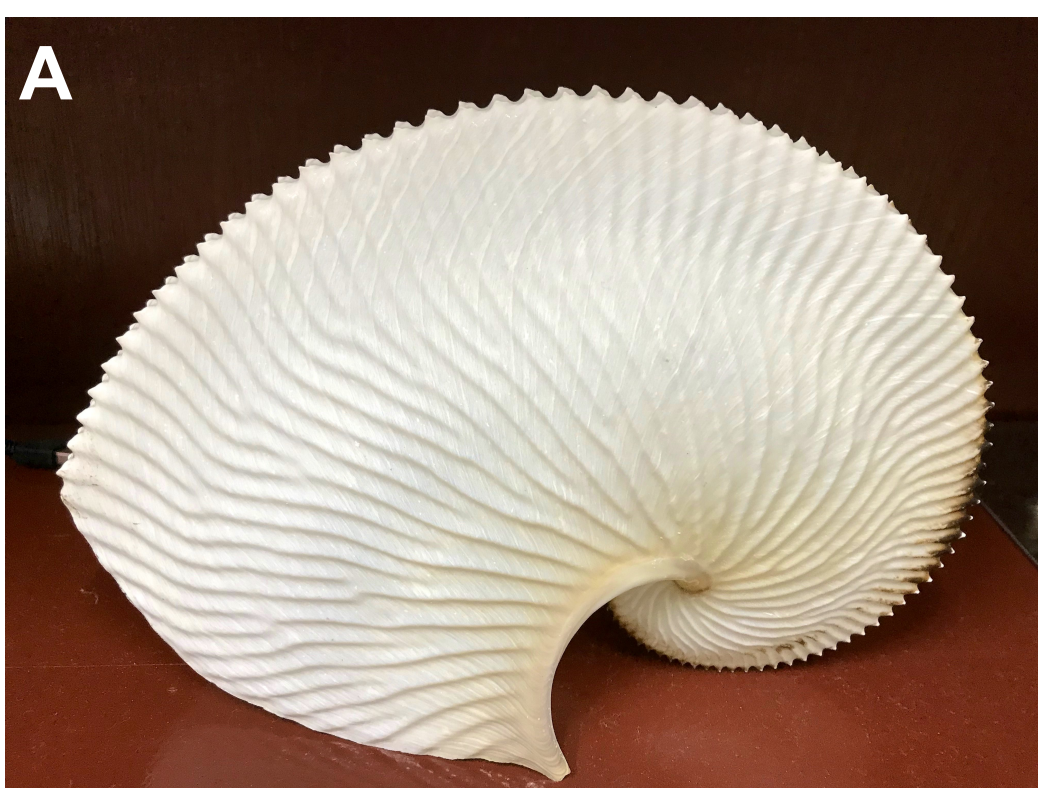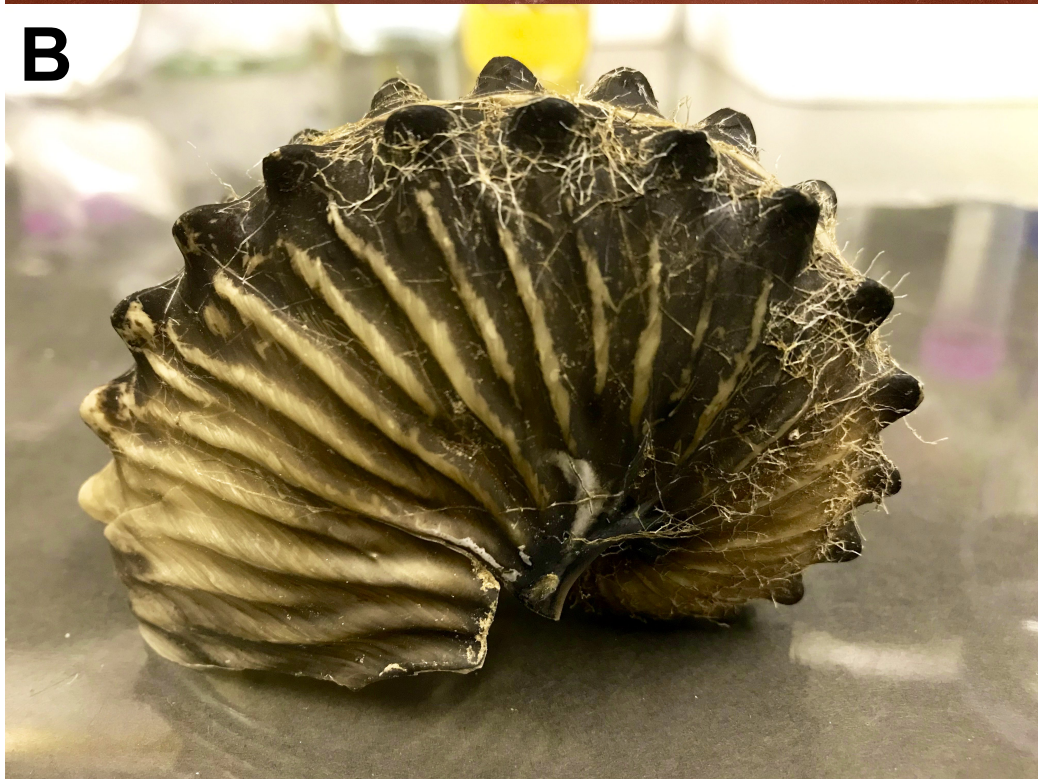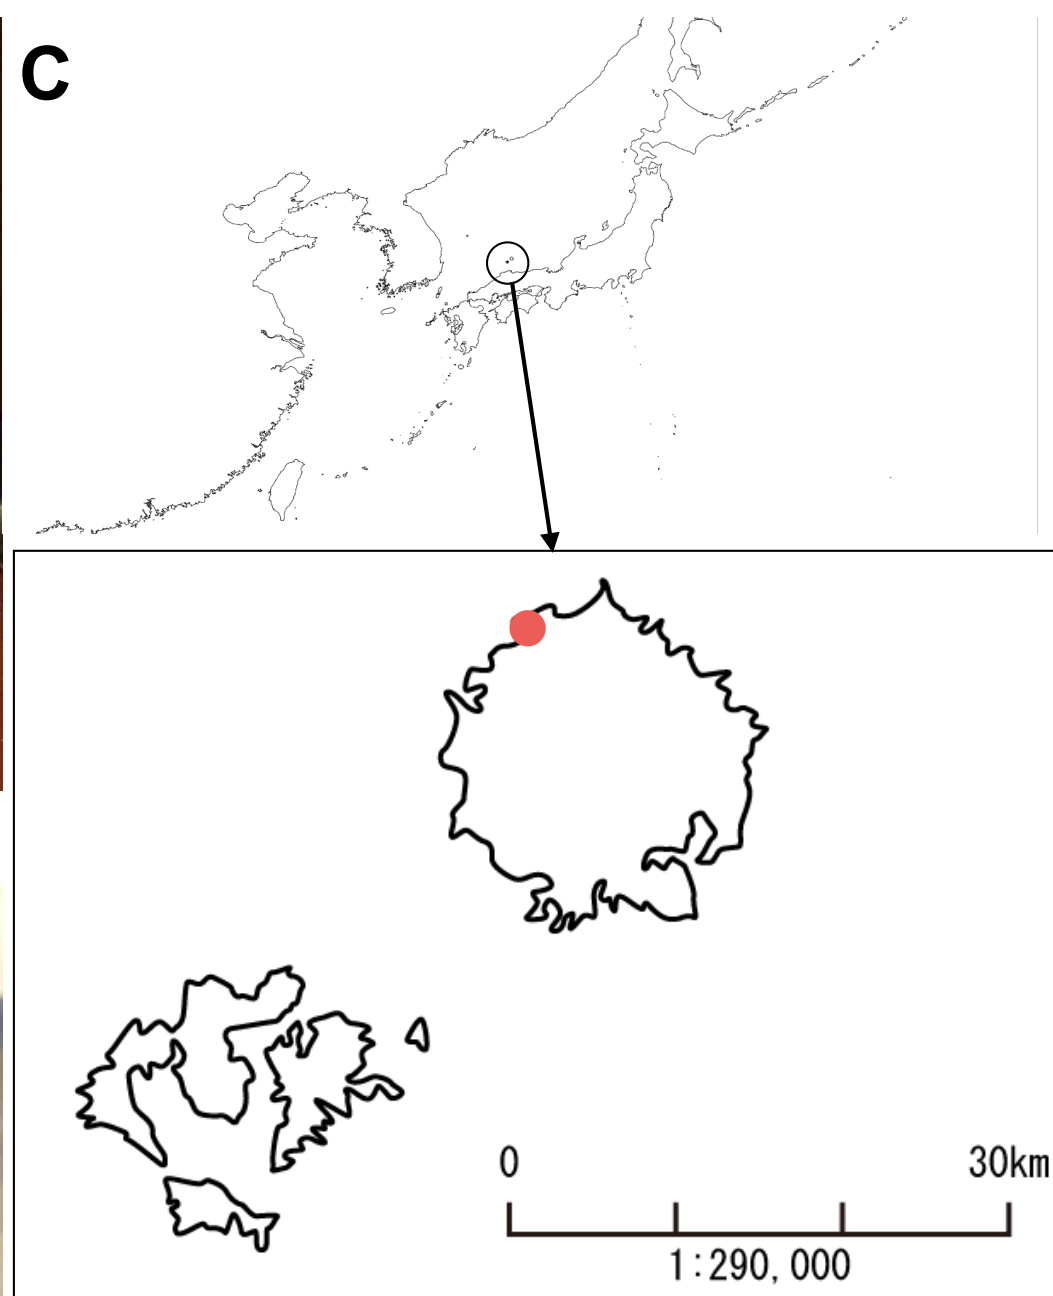

**Fig. 1**

**A**

Limpet

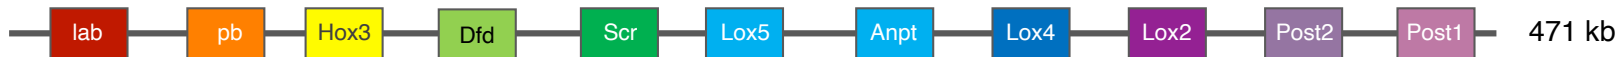

Giant squid

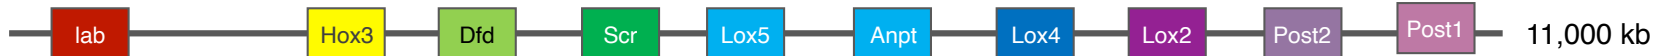

Not found

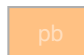

Bobtail squid

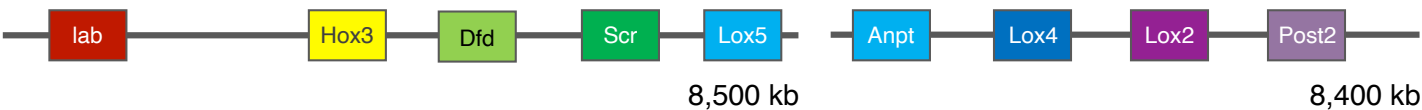

Not found

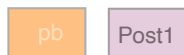

Octopus

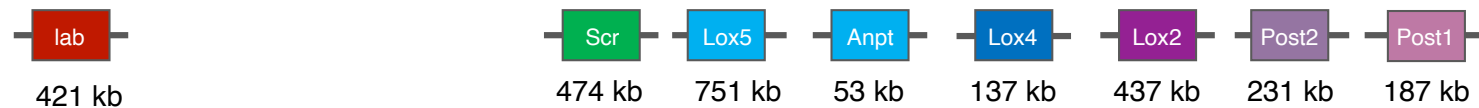

Not found

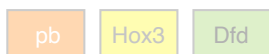Argonauta  
(This study)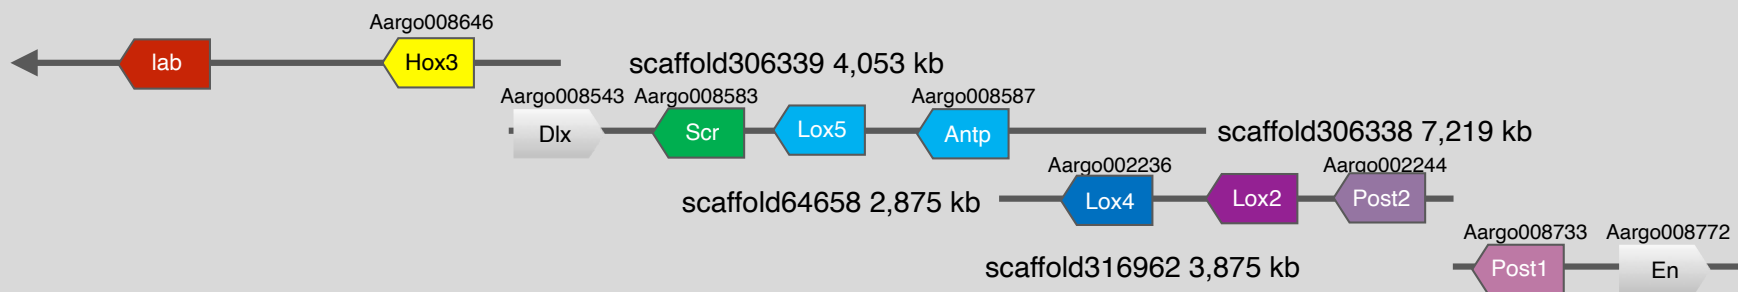

Not found

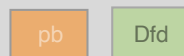**Fig.2**

**B**

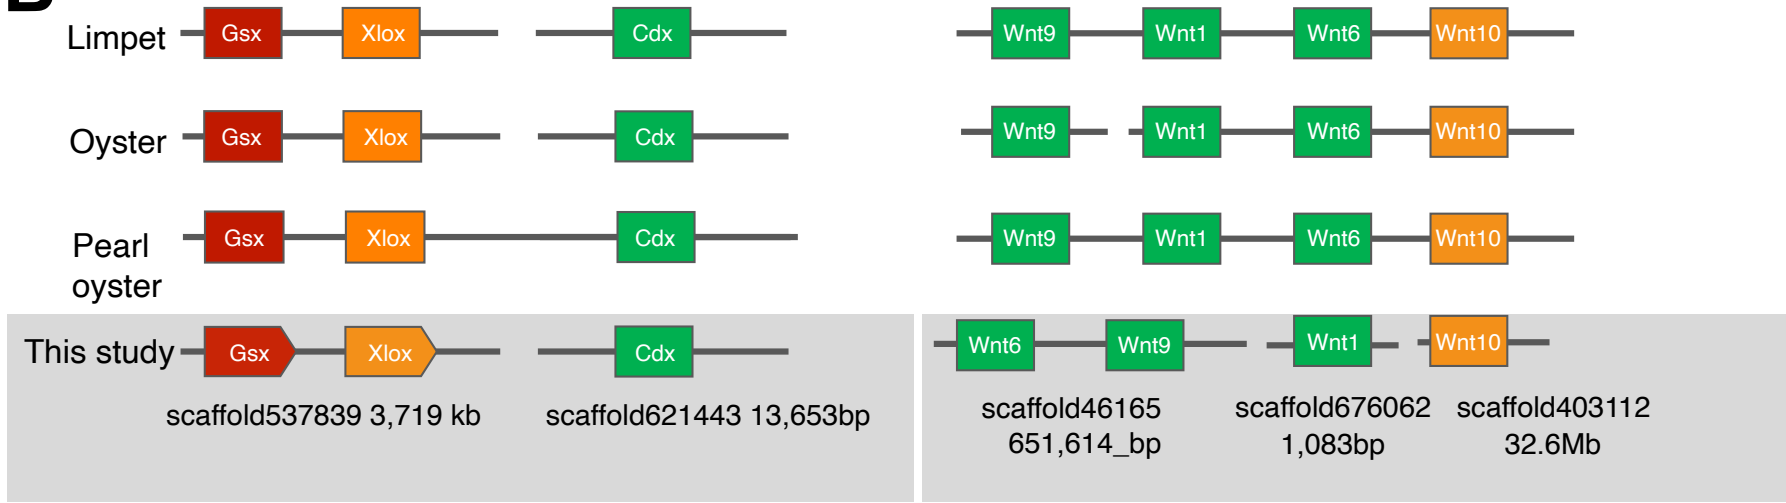

Fig.2b

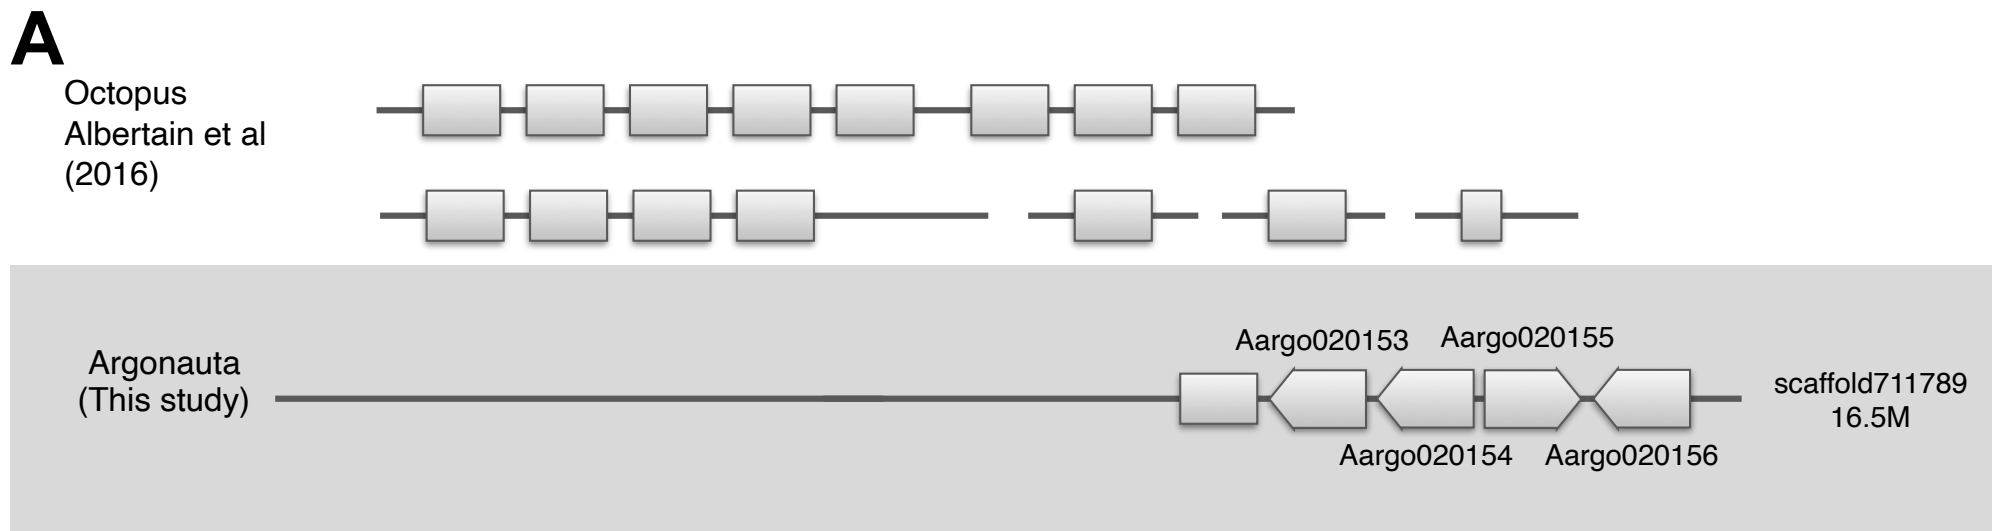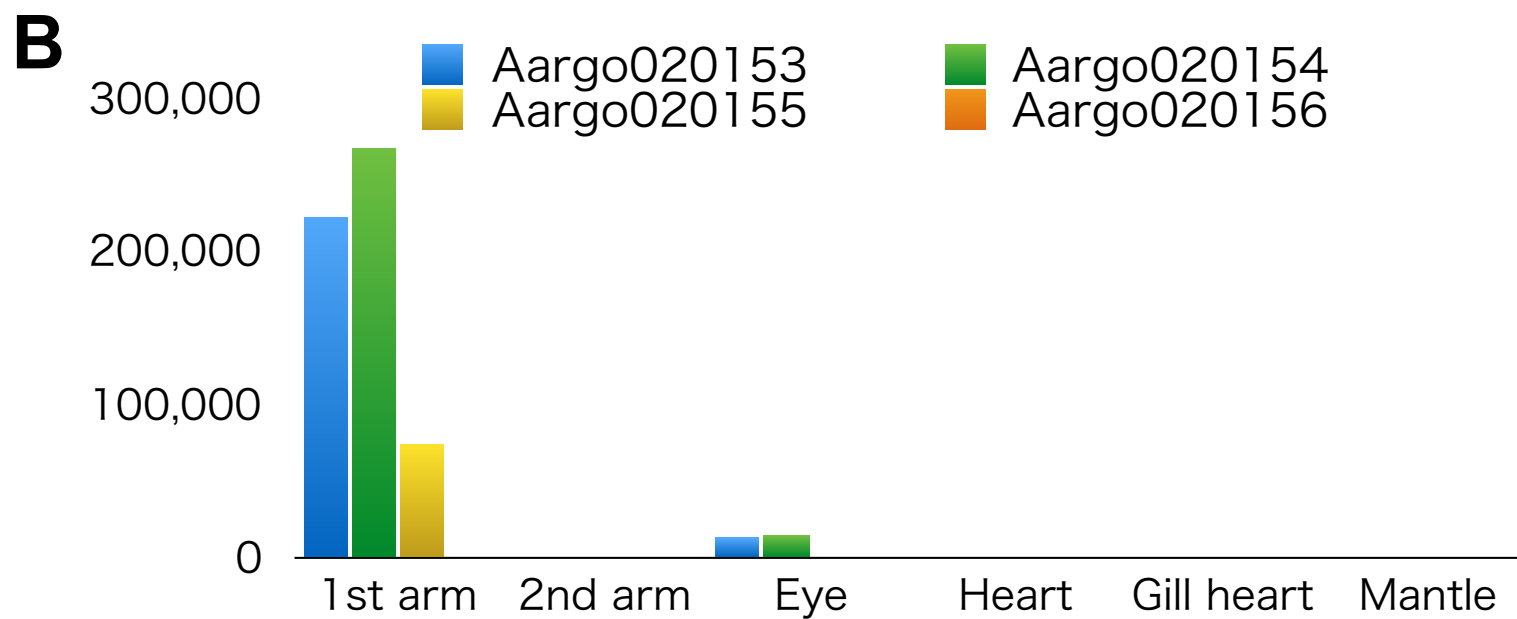

Fig.3

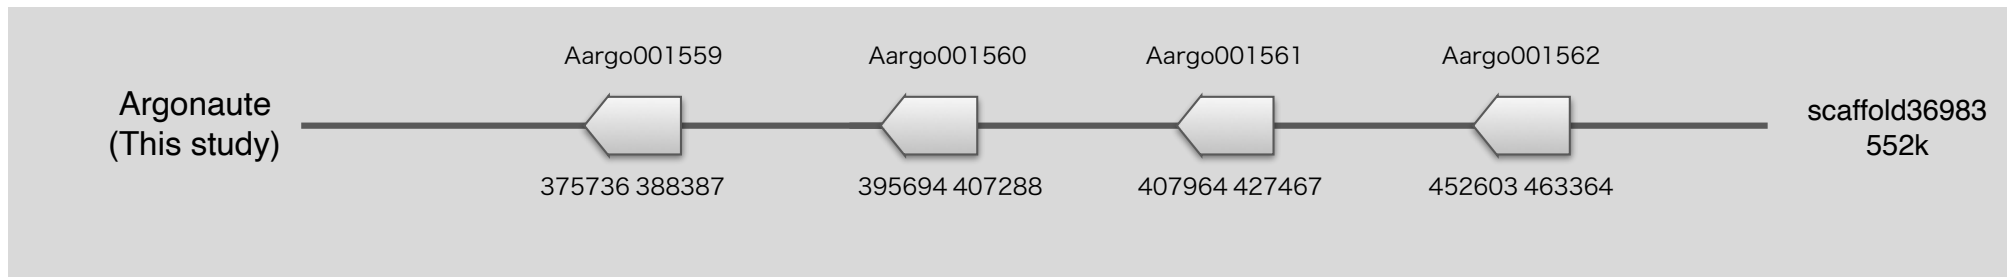

Fig.4

Fig. 5

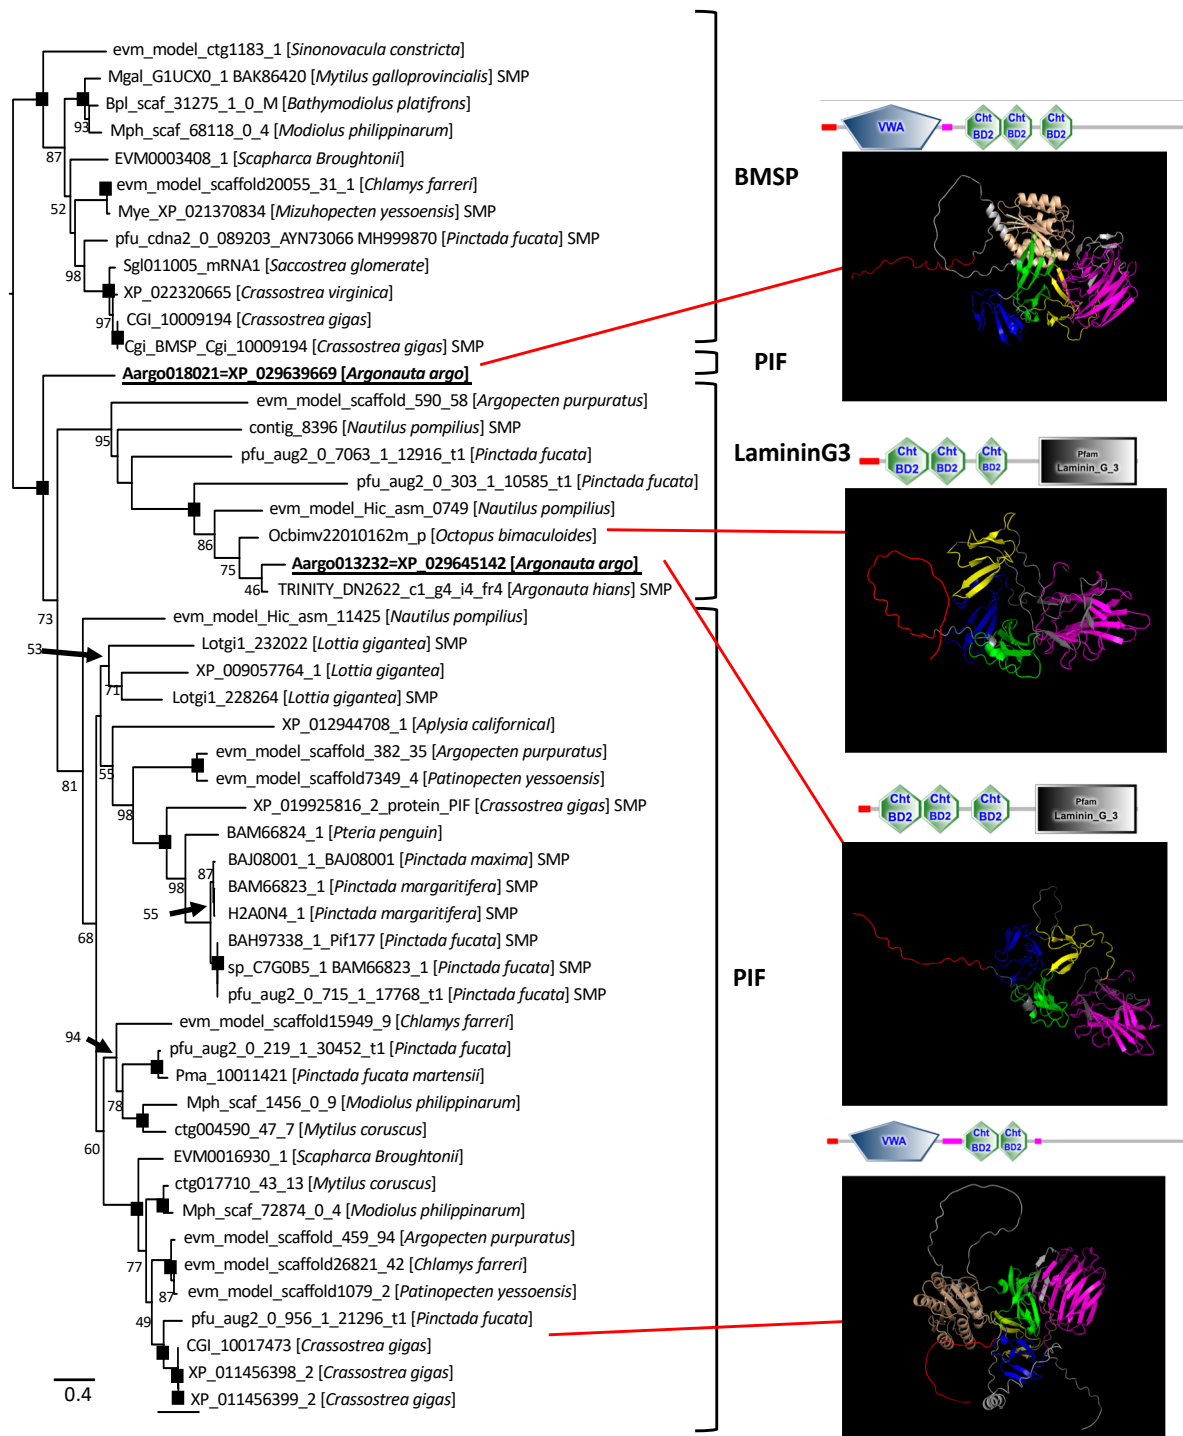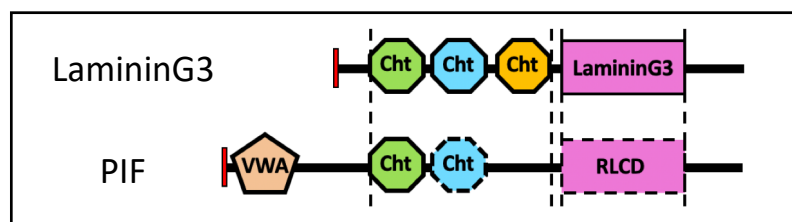

Source: https://www.biorxiv.org/content/biorxiv/early/2021/11/10/2021.11.08.467834.full.pdf
